# Supplementary material for: Transcriptomic and Proteomic Analysis of Shaan2A Cytoplasmic Male Sterility and Its Maintainer Line in Brassica napus
Source: Front Plant Sci. 2019 Mar 4;10:252. doi: 10.3389/fpls.2019.00252 (PMC6409359; doi:10.3389/fpls.2019.00252)
Supplement: TABLE S2 — Enriched KEGG pathways identified from DEGs at the YB and SA stages. Pathways were considered enriched at corrected P < 0.05. [file Table_2.XLSX]

## Sheet: YB
ALL DEG
#Term	Database	ID	Input number	Background number	P-Value	Corrected P-Value	Input	KEGG_ID/KO	Entrez_ID	Hyperlink
Protein processing in endoplasmic reticulum	KEGG PATHWAY	ath04141	169	220	0.000166661	0.0184994	BnaA05g35030D|BnaA07g19730D|BnaA03g26120D|BnaA03g56030D|BnaC01g16760D|BnaC09g41720D|BnaA07g33590D|BnaA06g03500D|BnaA09g07760D|BnaA04g16880D|BnaC09g41750D|BnaC04g40850D|BnaC08g26190D|BnaCnng37980D|BnaA09g15410D|BnaC06g17650D|BnaA04g13040D|BnaCnng55410D|BnaC08g30240D|BnaC04g46940D|BnaA07g12390D|BnaA09g00890D|BnaAnng07030D|BnaC06g38200D|BnaC07g50110D|BnaC05g01600D|BnaC04g51940D|BnaC04g04870D|BnaA10g…	ath:AT2G32920|ath:AT1G79940|ath:AT4G02570|ath:AT5G20570|ath:AT5G50460|ath:AT5G38470|ath:AT1G77510|ath:AT4G34210|ath:AT5G66680|ath:AT2G29070|ath:AT1G16190|ath:AT2G30050|ath:AT5G59300|ath:AT2G34250|ath:AT1G56330|ath:AT4G34210|ath:AT4G15410|ath:AT2G25700|ath:AT1G75950|ath:AT5G05470|ath:AT5G66680|ath:AT4G02570|ath:AT5G61790|ath:AT1G77510|ath:AT4G16660|ath:AT4G02570|ath:AT2G47470|ath:AT5G05470|ath:AT5…	817854|844334|825648|832179|835114|833835|844087|829569|836801|817455|838188|817556|836048|817986|842086|829569|827210|817111|843928|830430|836801|825648|836301|844087|827367|825648|819360|830430|831917|838779|838406|837441|838406|827210|827367|824661|835714|821195|825823|824580|828531|820438|832089|827210|842087|839355|827210|827210|836301|831917|841656|838604|819360|835114|825171|825434|824489|…	http://www.genome.jp/kegg-bin/show_pathway?ath04141/ath:AT4G02570%09red/ath:AT5G28540%09red/ath:AT3G60010%09red/ath:AT1G17280%09red/ath:AT3G60540%09red/ath:AT4G34210%09red/ath:AT4G21870%09red/ath:AT5G35080%09red/ath:AT2G29070%09red/ath:AT5G51440%09red/ath:AT1G21750%09red/ath:AT5G03160%09red/ath:AT5G05470%09red/ath:AT1G16190%09red/ath:AT3G57340%09red/ath:AT1G56330%09red/ath:AT1G52260%09red/ath:AT3…
Carbon metabolism	KEGG PATHWAY	ath01200	172	243	0.00206667	0.1147	BnaC04g33570D|BnaC08g30890D|BnaC03g60280D|BnaA02g00100D|BnaC08g46760D|BnaA04g11280D|BnaA02g28880D|BnaA01g15640D|BnaC03g03680D|BnaA09g36270D|BnaC02g36240D|BnaC02g24750D|BnaA02g11520D|BnaC06g27300D|BnaA08g16820D|BnaC05g18600D|BnaCnng14000D|BnaA08g02750D|BnaA05g11710D|BnaA03g04970D|BnaA04g27920D|BnaA04g25770D|BnaC05g24200D|BnaA08g06130D|BnaCnng45600D|BnaC08g05970D|BnaA09g02880D|BnaA09g46780D|BnaA07g…	ath:AT4G38970|ath:AT3G60750|ath:AT4G38970|ath:AT5G09660|ath:AT1G43670|ath:AT5G41670|ath:AT3G27380|ath:AT4G26530|ath:AT5G08570|ath:AT3G04050|ath:AT3G26650|ath:AT1G78050|ath:AT5G50850|ath:AT1G65930|ath:AT4G38970|ath:AT1G70580|ath:AT5G56350|ath:AT5G13420|ath:AT2G30970|ath:AT5G14590|ath:AT5G38430|ath:AT2G44530|ath:AT1G32060|ath:AT1G36370|ath:AT5G42250|ath:AT4G22110|ath:AT5G48230|ath:AT3G26650|ath:AT1…	830052|825246|830052|830825|840953|834169|822359|828759|830758|819560|822277|844140|835157|842905|830052|843395|835735|831183|817648|831311|833830|819061|840098|840543|834230|828300|834876|822277|842905|840098|834823|816781|833830|825246|837465|819061|818978|844291|818226|822277|822277|833830|840098|820166|822277|819042|833830|831039|816652|838342|815822|843395|843395|818231|833830|834823|816270|…	http://www.genome.jp/kegg-bin/show_pathway?ath01200/ath:AT3G61440%09red/ath:AT2G24270%09red/ath:AT5G11670%09red/ath:AT5G50850%09red/ath:AT1G55880%09red/ath:AT1G79530%09red/ath:AT1G24180%09red/ath:AT2G42600%09red/ath:AT4G14880%09red/ath:AT5G13420%09red/ath:AT3G04120%09red/ath:AT2G21170%09red/ath:AT1G42970%09red/ath:AT4G35260%09red/ath:AT5G26780%09red/ath:AT2G17640%09red/ath:AT5G47720%09red/ath:AT2…
Glycerolipid metabolism	KEGG PATHWAY	ath00561	47	52	0.00554094	0.154571	BnaA03g49040D|BnaC03g50590D|BnaC07g46060D|BnaA09g43530D|BnaC01g05200D|BnaC05g00450D|BnaCnng43470D|BnaC01g02370D|BnaC04g55420D|BnaA01g06700D|BnaC03g61970D|BnaC05g04490D|BnaC05g18900D|BnaCnng51890D|BnaA10g27550D|BnaA09g08200D|BnaA09g15750D|BnaC09g53950D|BnaC02g42690D|BnaA01g05080D|BnaA10g13450D|BnaA05g06580D|BnaC01g08060D|BnaC07g50560D|BnaC06g40610D|BnaA08g15200D|BnaC09g08430D|BnaA10g04260D|BnaCnng…	ath:AT4G28130|ath:AT5G63770|ath:AT4G36250|ath:AT2G20900|ath:AT4G33030|ath:AT1G01610|ath:AT2G38110|ath:AT4G36250|ath:AT3G57650|ath:AT4G30340|ath:AT4G36250|ath:AT1G06520|ath:AT1G23800|ath:AT4G31780|ath:AT5G01220|ath:AT5G20410|ath:AT5G42870|ath:AT5G60620|ath:AT5G63770|ath:AT4G31780|ath:AT5G60620|ath:AT2G38110|ath:AT4G30340|ath:AT4G28130|ath:AT1G80380|ath:AT4G36250|ath:AT5G20410|ath:AT1G06520|ath:AT5…	828928|836497|829782|816624|829440|839297|818389|829782|824934|829157|829782|837163|838991|829306|831888|832163|834298|836183|836497|829306|836183|818389|829157|828928|844378|829782|832163|837163|831888|836497|844385|841849|838991|829782|823955|829782|829157|829181|834298|818389|830736|823955|836183|829181|831208|818389|831888|	http://www.genome.jp/kegg-bin/show_pathway?ath00561/ath:AT1G06520%09red/ath:AT4G30580%09red/ath:AT4G36250%09red/ath:AT5G42870%09red/ath:AT5G20410%09red/ath:AT1G80460%09red/ath:AT4G30340%09red/ath:AT4G33030%09red/ath:AT5G60620%09red/ath:AT3G57650%09red/ath:AT2G38110%09red/ath:AT5G63770%09red/ath:AT5G01220%09red/ath:AT5G13640%09red/ath:AT4G28130%09red/ath:AT4G31780%09red/ath:AT5G08380%09red/ath:AT1…
Glycine, serine and threonine metabolism	KEGG PATHWAY	ath00260	58	69	0.00640626	0.154571	BnaC03g36350D|BnaA03g38340D|BnaC06g43710D|BnaC08g06270D|BnaA03g16100D|BnaC06g26170D|BnaC03g40970D|BnaC08g17520D|BnaAnng37640D|BnaC03g35770D|BnaC05g28570D|BnaC04g48360D|BnaA09g47510D|BnaA07g24840D|BnaA09g08290D|BnaC05g24600D|BnaC02g24750D|BnaCnng21170D|BnaA05g18150D|BnaA01g05670D|BnaC05g18600D|BnaC03g61150D|BnaA03g54620D|BnaA07g26770D|BnaC03g45180D|BnaC08g15110D|BnaA01g03860D|BnaC08g41790D|BnaA08g…	ath:AT3G08860|ath:AT2G13360|ath:AT1G70580|ath:AT1G70580|ath:AT2G35120|ath:AT1G68010|ath:AT3G19480|ath:AT1G17745|ath:AT1G32470|ath:AT3G10050|ath:AT1G32470|ath:AT2G42490|ath:AT1G11860|ath:AT1G68010|ath:AT2G13360|ath:AT1G32470|ath:AT1G78050|ath:AT1G31230|ath:AT1G32470|ath:AT4G39660|ath:AT1G70580|ath:AT4G37930|ath:AT1G62810|ath:AT1G68010|ath:AT2G13360|ath:AT1G11860|ath:AT2G26080|ath:AT1G11860|ath:AT1…	820034|815822|843395|843395|818078|843129|821482|838352|840141|820166|840141|818849|837733|843129|815822|840141|844140|840011|840141|830120|843395|829949|842580|843129|815822|837733|817149|837733|840543|843395|837385|844378|817149|833841|820034|815822|819608|840141|818849|841849|844140|843129|829949|829949|818078|843395|829949|843395|820166|826838|837733|816270|840141|832736|837385|818849|840141|…	http://www.genome.jp/kegg-bin/show_pathway?ath00260/ath:AT3G19480%09red/ath:AT5G26780%09red/ath:AT2G17630%09red/ath:AT1G62810%09red/ath:AT3G10050%09red/ath:AT5G38530%09red/ath:AT4G12290%09red/ath:AT1G32470%09red/ath:AT1G11860%09red/ath:AT1G36370%09red/ath:AT1G08630%09red/ath:AT1G70580%09red/ath:AT3G08860%09red/ath:AT4G37930%09red/ath:AT2G35120%09red/ath:AT1G17745%09red/ath:AT1G80380%09red/ath:AT1…
Peroxisome	KEGG PATHWAY	ath04146	65	81	0.00823396	0.154571	BnaA04g22710D|BnaA03g38340D|BnaA07g20920D|BnaA01g03200D|BnaC03g65530D|BnaC01g04460D|BnaC06g20910D|BnaC03g45180D|BnaC04g39580D|BnaC05g52100D|BnaA09g08290D|BnaA03g53180D|BnaC07g35250D|BnaCnng36970D|BnaC03g25380D|BnaC06g27300D|BnaA07g11370D|BnaC01g36930D|BnaA03g57590D|BnaC05g52090D|BnaA05g16170D|BnaA08g21730D|BnaA05g28000D|BnaA03g04970D|BnaA04g06290D|BnaA05g00640D|BnaA03g08520D|Novel01942|BnaA04g269…	ath:AT2G39970|ath:AT2G13360|ath:AT1G77590|ath:AT4G33790|ath:AT4G35090|ath:AT4G33790|ath:AT1G77590|ath:AT2G13360|ath:AT2G28190|ath:AT3G14150|ath:AT2G13360|ath:AT4G35090|ath:AT3G14415|ath:AT1G65930|ath:AT2G45690|ath:AT1G65930|ath:AT1G20630|ath:AT3G14415|ath:AT3G23790|ath:AT3G14150|ath:AT1G49430|ath:AT1G20630|ath:AT3G10920|ath:AT5G14590|ath:AT4G14070|ath:AT2G47240|ath:AT3G44550|ath:AT3G11980|ath:AT2…	818584|815822|844094|829521|829661|829521|844094|815822|817365|820632|815822|829661|820664|842905|819177|842905|838652|820664|821961|820632|841367|838652|820263|831311|827043|819337|823580|820372|819337|838652|820664|817365|822053|822053|817876|842905|815822|836635|832311|841720|820664|832311|836635|820372|820664|829661|818584|825905|841720|820664|820664|819337|821961|820630|820372|832311|820632|…	http://www.genome.jp/kegg-bin/show_pathway?ath04146/ath:AT2G45690%09red/ath:AT3G11980%09red/ath:AT4G14070%09red/ath:AT2G47240%09red/ath:AT5G22500%09red/ath:AT3G14415%09red/ath:AT4G33790%09red/ath:AT4G05530%09red/ath:AT2G39970%09red/ath:AT1G20630%09red/ath:AT3G23790%09red/ath:AT5G65110%09red/ath:AT3G56700%09red/ath:AT1G49430%09red/ath:AT2G33150%09red/ath:AT3G10920%09red/ath:AT3G14150%09red/ath:AT3…
Biosynthesis of secondary metabolites	KEGG PATHWAY	ath01110	594	995	0.0085813	0.154571	BnaC05g05190D|BnaC07g46060D|BnaA03g53180D|BnaC02g40820D|BnaA02g11520D|BnaC05g18600D|BnaA06g08740D|BnaA07g26770D|BnaA09g04980D|BnaC01g15740D|BnaC01g02400D|BnaA06g26820D|BnaCnng67080D|BnaA09g02880D|BnaA07g25510D|BnaA01g18180D|BnaA10g02480D|BnaA04g00400D|BnaA09g38720D|BnaC09g15310D|BnaC03g39970D|BnaA09g31220D|BnaCnng00430D|BnaA10g18960D|BnaA03g17980D|BnaA09g24950D|BnaA03g20770D|BnaAnng01260D|BnaC01g…	ath:AT2G29330|ath:AT4G36250|ath:AT4G35090|ath:AT5G25120|ath:AT5G50850|ath:AT1G70580|ath:AT1G13710|ath:AT1G68010|ath:AT5G24160|ath:AT4G23900|ath:AT4G36220|ath:AT5G24300|ath:AT1G60810|ath:AT5G48230|ath:AT1G65930|ath:AT5G48930|ath:AT1G04220|ath:AT4G27830|ath:AT3G60750|ath:AT1G58440|ath:AT3G17390|ath:AT1G70580|ath:AT5G48300|ath:AT5G15140|ath:AT2G38650|ath:AT1G31800|ath:AT2G44350|ath:AT5G05260|ath:AT4…	817482|829782|829661|832583|835157|843395|837932|843129|832482|828490|829779|832497|842375|834876|842905|834951|839578|828896|825246|842213|821003|843395|834883|831366|818447|840067|819042|830408|829854|837834|842596|831272|843395|842375|834823|817017|829891|837704|837704|830368|837704|829782|826788|820722|824861|837385|817481|839031|820664|819053|827322|817017|831400|829932|819052|839103|834398|…	http://www.genome.jp/kegg-bin/show_pathway?ath01110/ath:AT5G35170%09red/ath:AT3G26280%09red/ath:AT5G06720%09red/ath:AT2G43570%09red/ath:AT4G28680%09red/ath:AT4G15560%09red/ath:AT1G24180%09red/ath:AT5G50850%09red/ath:AT1G60810%09red/ath:AT3G17390%09red/ath:AT3G04120%09red/ath:AT3G47010%09red/ath:AT1G63180%09red/ath:AT1G05590%09red/ath:AT4G34250%09red/ath:AT3G01120%09red/ath:AT3G21240%09red/ath:AT5…
Protein export	KEGG PATHWAY	ath03060	46	53	0.00974774	0.154571	BnaC03g22370D|BnaA03g20980D|BnaC01g35840D|BnaA07g19730D|BnaC01g16760D|BnaA08g02950D|BnaAnng00870D|BnaC04g03960D|BnaA06g03460D|BnaC03g17190D|BnaA06g09990D|BnaC07g39190D|BnaA01g28550D|BnaCnng37980D|BnaC06g02320D|BnaA02g27160D|BnaA10g26220D|BnaA03g14210D|BnaA02g11680D|BnaA04g26040D|BnaC03g52150D|BnaA10g13270D|BnaC08g03210D|BnaCnng10600D|BnaA05g03460D|BnaC05g11610D|BnaCnng63570D|BnaA06g35150D|BnaA04g…	ath:AT2G39960|ath:AT3G60540|ath:AT1G52600|ath:AT1G79940|ath:AT5G50460|ath:AT1G48900|ath:AT5G03940|ath:AT3G60540|ath:AT5G49500|ath:AT5G28540|ath:AT1G15310|ath:AT5G50460|ath:AT1G52600|ath:AT2G34250|ath:AT5G49500|ath:AT2G01110|ath:AT5G03940|ath:AT5G28540|ath:AT5G50460|ath:AT3G60540|ath:AT5G61970|ath:AT5G60460|ath:AT1G48900|ath:AT5G03940|ath:AT2G43640|ath:AT1G15310|ath:AT2G43640|ath:AT2G01110|ath:AT2…	818583|825225|841692|844334|835114|841312|830273|825225|835010|832950|838100|835114|841692|817986|835010|814640|830273|832950|835114|825225|836318|836167|841312|830273|818966|838100|818966|814640|817429|836318|829183|841692|819185|836167|825225|836318|817429|817986|843093|820814|814640|841312|835114|832950|832950|839805|	http://www.genome.jp/kegg-bin/show_pathway?ath03060/ath:AT5G28540%09red/ath:AT1G67680%09red/ath:AT5G03940%09red/ath:AT3G60540%09red/ath:AT4G30600%09red/ath:AT1G15310%09red/ath:AT1G48900%09red/ath:AT3G15710%09red/ath:AT5G50460%09red/ath:AT1G52600%09red/ath:AT2G34250%09red/ath:AT5G60460%09red/ath:AT5G49500%09red/ath:AT5G61970%09red/ath:AT2G39960%09red/ath:AT1G79940%09red/ath:AT2G45770%09red/ath:AT2…
Fatty acid degradation	KEGG PATHWAY	ath00071	35	40	0.0206207	0.286113	BnaA07g20920D|BnaA09g24180D|BnaC07g46060D|BnaA09g18440D|BnaC06g20910D|BnaA05g17940D|BnaC01g02370D|BnaA02g32360D|BnaA03g57590D|BnaC03g61970D|BnaC05g18900D|BnaA05g16170D|BnaA04g06290D|BnaA09g02880D|BnaA06g24040D|BnaA04g26960D|BnaC08g05970D|BnaA05g00640D|BnaA08g15200D|BnaC03g49190D|BnaC09g20370D|BnaC03g18470D|BnaA08g00900D|BnaA09g43000D|BnaA09g29890D|BnaA03g59170D|BnaA06g16950D|BnaCnng45600D|BnaA01g…	ath:AT1G77590|ath:AT1G32780|ath:AT4G36250|ath:AT5G47720|ath:AT1G77590|ath:AT1G32780|ath:AT4G36250|ath:AT5G24760|ath:AT3G23790|ath:AT4G36250|ath:AT1G23800|ath:AT1G49430|ath:AT4G14070|ath:AT5G48230|ath:AT5G65110|ath:AT2G47240|ath:AT4G22110|ath:AT2G47240|ath:AT4G36250|ath:AT5G65110|ath:AT5G47720|ath:AT2G33150|ath:AT1G54100|ath:AT1G64710|ath:AT1G23800|ath:AT4G36250|ath:AT3G48000|ath:AT5G42250|ath:AT4…	844094|840172|829782|834823|844094|840172|829782|832545|821961|829782|838991|841367|827043|834876|836635|819337|828300|819337|829782|836635|834823|817876|841849|842779|838991|829782|823955|834230|829782|819337|821961|823955|841367|834876|840172|	http://www.genome.jp/kegg-bin/show_pathway?ath00071/ath:AT1G49430%09red/ath:AT2G33150%09red/ath:AT4G36250%09red/ath:AT1G54100%09red/ath:AT1G32780%09red/ath:AT5G65110%09red/ath:AT1G23800%09red/ath:AT5G24760%09red/ath:AT2G47240%09red/ath:AT1G64710%09red/ath:AT5G42250%09red/ath:AT4G14070%09red/ath:AT5G47720%09red/ath:AT3G23790%09red/ath:AT5G48230%09red/ath:AT4G22110%09red/ath:AT3G48000%09red/ath:AT1…
Cyanoamino acid metabolism	KEGG PATHWAY	ath00460	46	60	0.0375827	0.46352	BnaC02g09450D|BnaA02g16260D|BnaC01g34490D|BnaA08g19770D|BnaC01g01370D|BnaA01g00170D|BnaC07g22990D|BnaC06g43850D|BnaC09g50410D|BnaA03g01500D|BnaA05g04030D|BnaC03g61150D|BnaA07g23560D|BnaA09g39180D|BnaAnng39060D|BnaA06g17630D|BnaA01g27000D|BnaA10g25380D|BnaC04g03760D|BnaA08g06130D|BnaC07g41840D|BnaA07g05110D|BnaCnng00020D|BnaC08g32460D|BnaA05g34490D|BnaA01g00380D|BnaC03g54910D|BnaA04g00400D|BnaC04g…	ath:AT5G22300|ath:AT1G73050|ath:AT3G18080|ath:AT1G26560|ath:AT4G37560|ath:AT4G37930|ath:AT4G22100|ath:AT1G73050|ath:AT5G04885|ath:AT5G04885|ath:AT2G44460|ath:AT4G37930|ath:AT5G26780|ath:AT3G61440|ath:AT4G22100|ath:AT3G47010|ath:AT3G18080|ath:AT5G04885|ath:AT2G44460|ath:AT1G36370|ath:AT4G29210|ath:AT3G62750|ath:AT4G22100|ath:AT4G27830|ath:AT2G44450|ath:AT4G37560|ath:AT3G44300|ath:AT4G27830|ath:AT4…	832290|843636|821333|839196|829911|829949|828299|843636|830368|830368|819053|829949|832736|825317|828299|823854|821333|830368|819053|840543|829042|825450|828299|828896|819052|829911|823555|828896|828299|829949|828896|821201|843636|843636|828299|828299|830368|828299|823857|843636|819052|829949|830408|823555|823555|821691|	http://www.genome.jp/kegg-bin/show_pathway?ath00460/ath:AT3G61440%09red/ath:AT2G44460%09red/ath:AT5G05260%09red/ath:AT4G27830%09red/ath:AT3G47010%09red/ath:AT5G26780%09red/ath:AT3G03640%09red/ath:AT3G18080%09red/ath:AT4G22100%09red/ath:AT5G04885%09red/ath:AT1G36370%09red/ath:AT2G44450%09red/ath:AT1G73050%09red/ath:AT4G37930%09red/ath:AT4G29210%09red/ath:AT3G62750%09red/ath:AT1G26560%09red/ath:AT3…
UP
Carbon metabolism	KEGG PATHWAY	ath01200	123	243	1.29031e-07	1.31612e-05	BnaC04g33570D|BnaC03g03680D|BnaC03g60280D|BnaA02g00100D|BnaC08g46760D|BnaC03g40970D|BnaA01g15640D|BnaC08g30890D|BnaC03g35770D|BnaC02g36240D|BnaA08g16820D|BnaC05g18600D|BnaC03g61150D|BnaC02g00740D|BnaC03g45180D|BnaA04g27920D|BnaC05g24200D|BnaA08g06130D|BnaCnng45600D|BnaA09g31220D|BnaA09g46780D|BnaA08g07000D|BnaC09g20370D|BnaC01g00070D|BnaA07g14420D|BnaA09g38720D|BnaCnng06870D|BnaAnng28500D|BnaC08g…	ath:AT4G38970|ath:AT5G08570|ath:AT4G38970|ath:AT5G09660|ath:AT1G43670|ath:AT3G19480|ath:AT4G26530|ath:AT3G60750|ath:AT3G10050|ath:AT3G26650|ath:AT4G38970|ath:AT1G70580|ath:AT4G37930|ath:AT5G09660|ath:AT2G13360|ath:AT5G38430|ath:AT1G32060|ath:AT1G36370|ath:AT5G42250|ath:AT1G70580|ath:AT3G26650|ath:AT1G32060|ath:AT5G47720|ath:AT4G38970|ath:AT5G38430|ath:AT3G60750|ath:AT1G09420|ath:AT2G43750|ath:AT3…	830052|830758|830052|830825|840953|821482|828759|825246|820166|822277|830052|843395|829949|830825|815822|833830|840098|840543|834230|843395|822277|840098|834823|830052|833830|825246|837465|818978|822277|822277|840098|833830|822277|840098|831039|837931|838342|815822|843395|843395|833830|834823|829911|820461|824572|830052|827226|816271|824746|824746|833830|832873|815822|835945|830052|816652|836262|…	http://www.genome.jp/kegg-bin/show_pathway?ath01200/ath:AT3G61440%09red/ath:AT2G24270%09red/ath:AT5G28030%09red/ath:AT2G42600%09red/ath:AT4G14880%09red/ath:AT2G21170%09red/ath:AT1G42970%09red/ath:AT1G09420%09red/ath:AT5G47720%09red/ath:AT5G35790%09red/ath:AT2G22480%09red/ath:AT5G61410%09red/ath:AT3G60750%09red/ath:AT3G26650%09red/ath:AT1G17650%09red/ath:AT5G38430%09red/ath:AT5G08570%09red/ath:AT2…
Metabolic pathways	KEGG PATHWAY	ath01100	626	1861	1.12141e-05	0.000571919	BnaC05g05190D|BnaC07g46060D|BnaC01g35830D|BnaC01g06270D|BnaC03g28960D|BnaC02g36240D|BnaAnng06210D|BnaA05g09410D|BnaC06g26190D|BnaC02g40820D|BnaC05g18600D|BnaA05g09400D|BnaA06g08740D|BnaA04g07250D|BnaA01g22440D|BnaA09g04980D|BnaC09g33980D|BnaC01g02400D|BnaA03g03490D|BnaC01g09810D|BnaA07g26680D|BnaC02g48890D|BnaA01g18180D|BnaC09g08190D|BnaA04g00400D|BnaA09g38720D|BnaA02g01390D|BnaC03g39970D|BnaA09g…	ath:AT2G29330|ath:AT4G36250|ath:AT3G15730|ath:AT4G32260|ath:AT4G10340|ath:AT3G26650|ath:AT5G08280|ath:AT2G34430|ath:AT3G45140|ath:AT5G25120|ath:AT1G70580|ath:AT2G34430|ath:AT1G13710|ath:AT4G12800|ath:AT1G60600|ath:AT5G24160|ath:AT5G58670|ath:AT4G36220|ath:AT5G11720|ath:AT4G28660|ath:AT1G67740|ath:AT5G66570|ath:AT5G48930|ath:AT1G20020|ath:AT4G27830|ath:AT3G60750|ath:AT5G13050|ath:AT3G17390|ath:AT1…	817482|829782|820816|829359|826626|822277|830724|818006|823650|832583|843395|818006|837932|826892|842354|832482|835981|829779|831044|828984|843099|836789|834951|838591|828896|825246|831144|821003|843395|820630|838151|817606|826626|837733|831144|839009|820034|839871|843395|821143|833830|834823|829891|837704|837704|818389|824934|837704|829782|820722|824861|841367|837178|838591|824746|820664|832234|…	http://www.genome.jp/kegg-bin/show_pathway?ath01100/ath:AT5G63310%09red/ath:AT5G06720%09red/ath:AT3G04520%09red/ath:AT4G28680%09red/ath:AT4G15560%09red/ath:AT3G55630%09red/ath:AT1G06680%09red/ath:AT4G28750%09red/ath:AT3G17390%09red/ath:AT3G47010%09red/ath:AT1G05590%09red/ath:AT4G14070%09red/ath:AT5G47720%09red/ath:AT4G14880%09red/ath:AT1G55670%09red/ath:AT1G31800%09red/ath:AT1G08550%09red/ath:AT3…
Biosynthesis of secondary metabolites	KEGG PATHWAY	ath01110	355	995	3.55312e-05	0.00120454	BnaC05g05190D|BnaC07g46060D|BnaA03g53180D|BnaC02g40820D|BnaC05g18600D|BnaA06g08740D|BnaA01g22440D|BnaA09g04980D|BnaC01g02400D|BnaA01g18180D|BnaA04g00400D|BnaA09g38720D|BnaC03g39970D|BnaA09g31220D|BnaCnng00430D|BnaC01g01800D|BnaA08g27540D|BnaC06g43710D|BnaA09g18440D|BnaCnng46320D|BnaC08g41990D|BnaA08g31590D|BnaC03g61970D|BnaC05g38600D|BnaC08g27800D|BnaA05g18150D|BnaC07g35250D|BnaA02g02630D|BnaC01g…	ath:AT2G29330|ath:AT4G36250|ath:AT4G35090|ath:AT5G25120|ath:AT1G70580|ath:AT1G13710|ath:AT1G60600|ath:AT5G24160|ath:AT4G36220|ath:AT5G48930|ath:AT4G27830|ath:AT3G60750|ath:AT3G17390|ath:AT1G70580|ath:AT5G48300|ath:AT4G37000|ath:AT1G03630|ath:AT1G70580|ath:AT5G47720|ath:AT1G11600|ath:AT1G11600|ath:AT1G11600|ath:AT4G36250|ath:AT3G14930|ath:AT3G56940|ath:AT1G32470|ath:AT3G14415|ath:AT5G15470|ath:AT4…	817482|829782|829661|832583|843395|837932|842354|832482|829779|834951|828896|825246|821003|843395|834883|829854|839009|843395|834823|837704|837704|837704|829782|820722|824861|840141|820664|831400|829932|819052|834398|830052|840067|822709|820632|836451|820461|842198|817481|819052|839395|838165|817165|836478|827371|840141|828299|824678|843788|815822|821333|827230|816725|827580|828299|830825|840141|…	http://www.genome.jp/kegg-bin/show_pathway?ath01110/ath:AT5G35170%09red/ath:AT5G06720%09red/ath:AT3G04520%09red/ath:AT4G28680%09red/ath:AT4G15560%09red/ath:AT3G17390%09red/ath:AT3G47010%09red/ath:AT1G05590%09red/ath:AT4G34250%09red/ath:AT5G47720%09red/ath:AT1G31800%09red/ath:AT5G05690%09red/ath:AT2G43570%09red/ath:AT1G13700%09red/ath:AT4G36810%09red/ath:AT4G37000%09red/ath:AT5G08570%09red/ath:AT2…
Glycine, serine and threonine metabolism	KEGG PATHWAY	ath00260	43	69	5.53797e-05	0.00120454	BnaC03g36350D|BnaA03g38340D|BnaC05g28570D|BnaC08g06270D|BnaC06g26170D|BnaC03g40970D|BnaC08g17520D|BnaAnng37640D|BnaC03g35770D|BnaC06g43710D|BnaA09g47510D|BnaA07g24840D|BnaA09g08290D|BnaC05g24600D|BnaA05g18150D|BnaC05g18600D|BnaC02g28390D|BnaA03g54620D|BnaA07g26770D|BnaC03g45180D|BnaC08g15110D|BnaA01g03860D|BnaC08g41790D|BnaA08g06130D|BnaA08g20540D|BnaC06g40610D|BnaC01g05230D|BnaA07g14490D|BnaA03g…	ath:AT3G08860|ath:AT2G13360|ath:AT1G32470|ath:AT1G70580|ath:AT1G68010|ath:AT3G19480|ath:AT1G17745|ath:AT1G32470|ath:AT3G10050|ath:AT1G70580|ath:AT1G11860|ath:AT1G68010|ath:AT2G13360|ath:AT1G32470|ath:AT1G32470|ath:AT1G70580|ath:AT4G12290|ath:AT1G62810|ath:AT1G68010|ath:AT2G13360|ath:AT1G11860|ath:AT2G26080|ath:AT1G11860|ath:AT1G36370|ath:AT1G70580|ath:AT1G80380|ath:AT2G26080|ath:AT5G38530|ath:AT3…	820034|815822|840141|843395|843129|821482|838352|840141|820166|843395|837733|843129|815822|840141|840141|843395|826838|842580|843129|815822|837733|817149|837733|840543|843395|844378|817149|833841|820034|815822|819608|840141|843129|829949|829949|843395|843395|820166|829949|837733|840141|829949|840141|	http://www.genome.jp/kegg-bin/show_pathway?ath00260/ath:AT1G62810%09red/ath:AT3G10050%09red/ath:AT5G38530%09red/ath:AT1G70580%09red/ath:AT4G12290%09red/ath:AT1G80380%09red/ath:AT1G68010%09red/ath:AT3G08860%09red/ath:AT3G19480%09red/ath:AT1G32470%09red/ath:AT2G26080%09red/ath:AT1G11860%09red/ath:AT4G37930%09red/ath:AT2G13360%09red/ath:AT1G17745%09red/ath:AT1G36370%09red/ath:AT3G04520%09red
Fatty acid elongation	KEGG PATHWAY	ath00062	26	31	5.9046e-05	0.00120454	BnaC01g04130D|BnaA04g15380D|BnaC08g26140D|BnaA09g51530D|BnaC06g28830D|BnaA04g06040D|BnaC03g04350D|Novel01989|BnaC05g00780D|BnaC02g17470D|BnaC09g46070D|BnaA09g28510D|BnaC04g28680D|BnaA05g01150D|BnaA10g02480D|BnaA07g26670D|BnaC05g02350D|BnaA10g21780D|BnaA06g36580D|BnaC04g38330D|BnaC08g46130D|BnaC04g00710D|BnaC01g20970D|Novel02085|BnaA10g00700D|BnaC05g00770D	ath:AT4G34250|ath:AT2G26250|ath:AT3G55360|ath:AT1G01120|ath:AT1G67730|ath:AT4G14440|ath:AT5G10480|ath:AT1G68530|ath:AT1G01120|ath:AT1G67730|ath:AT5G10480|ath:AT1G68530|ath:AT4G14440|ath:AT2G46720|ath:AT1G04220|ath:AT1G67730|ath:AT1G04220|ath:AT5G10480|ath:AT5G43760|ath:AT2G26250|ath:AT1G01120|ath:AT2G46720|ath:AT4G17480|ath:AT2G15090|ath:AT1G01120|ath:AT1G01120|	829574|817165|824702|839395|843098|827089|830912|843182|839395|843098|830912|843182|827089|819284|839578|843098|839578|830912|834398|817165|839395|819284|827459|815998|839395|839395|	http://www.genome.jp/kegg-bin/show_pathway?ath00062/ath:AT2G26250%09red/ath:AT1G67730%09red/ath:AT5G43760%09red/ath:AT3G55360%09red/ath:AT1G68530%09red/ath:AT1G01120%09red/ath:AT2G46720%09red/ath:AT4G34250%09red/ath:AT2G15090%09red/ath:AT5G10480%09red/ath:AT4G14440%09red/ath:AT4G17480%09red/ath:AT1G04220%09red
Peroxisome	KEGG PATHWAY	ath04146	44	81	0.000451802	0.00768064	BnaA03g38340D|BnaA01g03200D|BnaC03g65530D|BnaC01g04460D|BnaA10g13850D|BnaC04g39580D|BnaA09g08290D|BnaA03g53180D|BnaA07g11370D|BnaC01g36930D|BnaC05g52090D|BnaA05g16170D|BnaA08g21730D|BnaC03g45180D|BnaA04g06290D|BnaA05g00640D|BnaA05g28000D|BnaC07g35250D|BnaA04g26960D|BnaC08g19360D|BnaC01g36940D|BnaA04g16310D|BnaC09g08540D|BnaA06g01790D|BnaA01g29420D|BnaC09g36490D|BnaA03g08520D|BnaC02g09540D|BnaA05g…	ath:AT2G13360|ath:AT4G33790|ath:AT4G35090|ath:AT4G33790|ath:AT5G22500|ath:AT2G28190|ath:AT2G13360|ath:AT4G35090|ath:AT1G20630|ath:AT3G14415|ath:AT3G14150|ath:AT1G49430|ath:AT1G20630|ath:AT2G13360|ath:AT4G14070|ath:AT2G47240|ath:AT3G10920|ath:AT3G14415|ath:AT2G47240|ath:AT1G20630|ath:AT3G14415|ath:AT2G28190|ath:AT2G13360|ath:AT1G52870|ath:AT3G14415|ath:AT5G22500|ath:AT3G44550|ath:AT5G22500|ath:AT3…	815822|829521|829661|829521|832311|817365|815822|829661|838652|820664|820632|841367|838652|815822|827043|819337|820263|820664|819337|838652|820664|817365|815822|841720|820664|832311|823580|832311|820664|829661|820632|841720|820664|820664|819337|820630|820632|820664|820630|841367|829661|820664|820664|838652|	http://www.genome.jp/kegg-bin/show_pathway?ath04146/ath:AT4G33790%09red/ath:AT1G49430%09red/ath:AT3G44550%09red/ath:AT1G20630%09red/ath:AT3G14130%09red/ath:AT4G35090%09red/ath:AT3G14150%09red/ath:AT1G52870%09red/ath:AT4G14070%09red/ath:AT2G47240%09red/ath:AT2G13360%09red/ath:AT3G14415%09red/ath:AT3G10920%09red/ath:AT2G28190%09red/ath:AT5G22500%09red
Cutin, suberine and wax biosynthesis	KEGG PATHWAY	ath00073	18	23	0.00137438	0.0200267	BnaA10g00380D|BnaCnng09200D|BnaC05g00460D|BnaA05g28270D|BnaA09g15080D|BnaA01g03200D|BnaC02g21680D|BnaC01g04460D|BnaA10g13850D|BnaA07g22900D|BnaC09g36490D|BnaC02g09540D|BnaC09g51620D|BnaA03g08520D|BnaC06g12160D|BnaA09g15090D|BnaA05g12980D|BnaCnng08760D	ath:AT1G01600|ath:AT1G02205|ath:AT1G01600|ath:AT3G10570|ath:AT1G57750|ath:AT4G33790|ath:AT1G72970|ath:AT4G33790|ath:AT5G22500|ath:AT1G72970|ath:AT5G22500|ath:AT5G22500|ath:AT1G57750|ath:AT3G44550|ath:AT5G37300|ath:AT1G57750|ath:AT5G37300|ath:AT1G01600|	839347|837602|839347|820222|842150|829521|843628|829521|832311|843628|832311|832311|842150|823580|833704|842150|833704|839347|	http://www.genome.jp/kegg-bin/show_pathway?ath00073/ath:AT4G33790%09red/ath:AT1G57750%09red/ath:AT3G10570%09red/ath:AT1G02205%09red/ath:AT3G44550%09red/ath:AT1G72970%09red/ath:AT5G37300%09red/ath:AT5G22500%09red/ath:AT1G01600%09red
Pentose phosphate pathway	KEGG PATHWAY	ath00030	30	54	0.00266138	0.0339326	BnaC04g33570D|BnaC08g30890D|BnaC03g60280D|BnaCnng43240D|BnaA01g15640D|BnaA01g33410D|BnaA06g37230D|BnaC04g26530D|BnaA04g04350D|BnaAnng40850D|BnaC09g48610D|BnaC08g48810D|BnaA08g30000D|BnaC08g46760D|BnaA09g46150D|BnaA04g01120D|BnaA04g12130D|BnaC08g35040D|BnaC01g00070D|BnaA09g38720D|BnaA08g29810D|BnaC07g47470D|BnaA03g40170D|BnaCnng06870D|BnaC08g35820D|BnaAnng17200D|BnaA08g16820D|BnaC04g22010D|BnaA09g…	ath:AT4G38970|ath:AT3G60750|ath:AT4G38970|ath:AT5G61410|ath:AT4G26530|ath:AT3G04790|ath:AT4G38970|ath:AT3G54050|ath:AT3G54050|ath:AT4G38970|ath:AT5G61410|ath:AT3G54050|ath:AT5G35790|ath:AT1G43670|ath:AT1G13700|ath:AT3G60750|ath:AT4G38970|ath:AT2G22480|ath:AT4G38970|ath:AT3G60750|ath:AT1G43670|ath:AT4G38970|ath:AT5G61410|ath:AT1G09420|ath:AT4G38970|ath:AT3G54050|ath:AT4G38970|ath:AT3G60750|ath:AT2…	830052|825246|830052|836262|828759|819639|830052|824572|824572|830052|836262|824572|833559|840953|837931|825246|830052|816781|830052|825246|840953|830052|836262|837465|830052|824572|830052|825246|816962|836262|	http://www.genome.jp/kegg-bin/show_pathway?ath00030/ath:AT5G61410%09red/ath:AT3G60750%09red/ath:AT1G13700%09red/ath:AT2G24270%09red/ath:AT2G22480%09red/ath:AT4G26530%09red/ath:AT4G38970%09red/ath:AT1G09420%09red/ath:AT3G04790%09red/ath:AT3G54050%09red/ath:AT5G35790%09red/ath:AT1G43670%09red
Thiamine metabolism	KEGG PATHWAY	ath00730	10	11	0.0080964	0.0892608	BnaC09g31160D|BnaA10g08550D|BnaA02g27980D|BnaC03g71780D|BnaA03g11710D|BnaA01g35430D|BnaA05g12410D|BnaC01g22400D|BnaC07g33090D|BnaA02g09460D	ath:AT5G54770|ath:AT5G54770|ath:AT5G54770|ath:AT5G54770|ath:AT5G54770|ath:AT4G15560|ath:AT2G29630|ath:AT4G15560|ath:AT4G15560|ath:AT5G54770|	835567|835567|835567|835567|835567|827230|817513|827230|827230|835567|	http://www.genome.jp/kegg-bin/show_pathway?ath00730/ath:AT5G54770%09red/ath:AT2G29630%09red/ath:AT4G15560%09red
One carbon pool by folate	KEGG PATHWAY	ath00670	14	20	0.00903795	0.0892608	BnaC06g03660D|BnaA08g06130D|BnaC03g61150D|BnaA08g25100D|BnaA07g21280D|BnaA08g15890D|BnaC08g15110D|BnaA02g01390D|BnaC01g01090D|BnaA09g47510D|BnaA01g00170D|BnaC08g41790D|BnaA06g02790D|BnaA10g20240D	ath:AT1G50480|ath:AT1G36370|ath:AT4G37930|ath:AT1G11860|ath:AT1G76730|ath:AT4G37930|ath:AT1G11860|ath:AT5G13050|ath:AT4G37930|ath:AT1G11860|ath:AT4G37930|ath:AT1G11860|ath:AT1G50480|ath:AT5G13050|	841470|840543|829949|837733|844007|829949|837733|831144|829949|837733|829949|837733|841470|831144|	http://www.genome.jp/kegg-bin/show_pathway?ath00670/ath:AT1G76730%09red/ath:AT1G50480%09red/ath:AT4G37930%09red/ath:AT1G11860%09red/ath:AT5G13050%09red/ath:AT1G36370%09red
Tryptophan metabolism	KEGG PATHWAY	ath00380	24	45	0.00976191	0.0892608	BnaC07g46060D|BnaA09g18440D|BnaC01g02370D|BnaA03g53180D|BnaC03g61970D|BnaA07g11370D|BnaC07g15280D|BnaA08g21730D|BnaC03g65530D|BnaC09g36910D|BnaC08g19360D|BnaA08g15200D|BnaC09g20370D|BnaC03g54910D|BnaA08g10870D|BnaA03g59170D|BnaC07g45360D|BnaC02g40420D|BnaA01g01360D|BnaA01g04490D|BnaC02g07040D|BnaA06g38980D|BnaA02g14990D|BnaC02g19980D	ath:AT4G36250|ath:AT5G47720|ath:AT4G36250|ath:AT4G35090|ath:AT4G36250|ath:AT1G20630|ath:AT1G20630|ath:AT1G20630|ath:AT4G35090|ath:AT5G20960|ath:AT1G20630|ath:AT4G36250|ath:AT5G47720|ath:AT3G44300|ath:AT4G35090|ath:AT4G36250|ath:AT4G35090|ath:AT5G26000|ath:AT4G36250|ath:AT4G32540|ath:AT3G44300|ath:AT3G44300|ath:AT1G70560|ath:AT1G70560|	829782|834823|829782|829661|829782|838652|838652|838652|829661|832221|838652|829782|834823|823555|829661|829782|829661|832669|829782|829389|823555|823555|843393|843393|	http://www.genome.jp/kegg-bin/show_pathway?ath00380/ath:AT3G44300%09red/ath:AT4G36250%09red/ath:AT1G70560%09red/ath:AT5G26000%09red/ath:AT4G32540%09red/ath:AT1G20630%09red/ath:AT5G47720%09red/ath:AT4G35090%09red/ath:AT5G20960%09red
Alanine, aspartate and glutamate metabolism	KEGG PATHWAY	ath00250	25	48	0.0105013	0.0892608	BnaC03g36350D|BnaA03g38340D|BnaC06g43710D|BnaC08g06270D|BnaC03g75390D|BnaC03g15030D|BnaC08g07930D|BnaA09g08290D|BnaA05g22420D|BnaC04g29670D|BnaCnng23850D|BnaC05g18600D|BnaC03g45180D|BnaA05g11710D|BnaA03g51850D|BnaA03g31030D|BnaA04g07450D|BnaA01g02440D|BnaC09g08540D|BnaA01g24820D|BnaA08g20540D|BnaAnng22050D|BnaA09g31220D|BnaA02g12430D|BnaC03g15020D	ath:AT3G08860|ath:AT2G13360|ath:AT1G70580|ath:AT1G70580|ath:AT3G47340|ath:AT5G53460|ath:AT5G35630|ath:AT2G13360|ath:AT3G17820|ath:AT5G35630|ath:AT5G37600|ath:AT1G70580|ath:AT2G13360|ath:AT2G30970|ath:AT4G31990|ath:AT3G08860|ath:AT5G35630|ath:AT4G34740|ath:AT2G13360|ath:AT3G22200|ath:AT1G70580|ath:AT1G70580|ath:AT1G70580|ath:AT5G37600|ath:AT5G53460|	820034|815822|843395|843395|823888|835427|833535|815822|821050|833535|833738|843395|815822|817648|829330|820034|833535|829626|815822|821784|843395|843395|843395|833738|835427|	http://www.genome.jp/kegg-bin/show_pathway?ath00250/ath:AT3G17820%09red/ath:AT1G70580%09red/ath:AT3G22200%09red/ath:AT3G08860%09red/ath:AT4G31990%09red/ath:AT4G34740%09red/ath:AT5G37600%09red/ath:AT3G47340%09red/ath:AT2G13360%09red/ath:AT5G35630%09red/ath:AT2G30970%09red/ath:AT5G53460%09red
Cyanoamino acid metabolism	KEGG PATHWAY	ath00460	29	60	0.0130777	0.10261	BnaC02g09450D|BnaC01g34490D|BnaC01g01370D|BnaC07g22990D|BnaA08g15890D|BnaA09g39180D|BnaC03g61150D|BnaA05g04030D|BnaAnng39060D|BnaA06g17630D|BnaA01g27000D|BnaA08g06130D|BnaC07g41840D|BnaA01g00380D|BnaCnng00020D|BnaC08g32460D|BnaC04g51140D|BnaA07g05110D|BnaC03g54910D|BnaA04g00400D|BnaC01g01090D|BnaA01g00170D|BnaA05g34490D|BnaA03g21850D|BnaC03g26130D|Novel04732|BnaC04g03750D|BnaA06g38980D|BnaC02g070…	ath:AT5G22300|ath:AT3G18080|ath:AT4G37560|ath:AT4G22100|ath:AT4G37930|ath:AT3G61440|ath:AT4G37930|ath:AT2G44460|ath:AT4G22100|ath:AT3G47010|ath:AT3G18080|ath:AT1G36370|ath:AT4G29210|ath:AT4G37560|ath:AT4G22100|ath:AT4G27830|ath:AT4G22100|ath:AT3G62750|ath:AT3G44300|ath:AT4G27830|ath:AT4G37930|ath:AT4G37930|ath:AT2G44450|ath:AT4G22100|ath:AT4G22100|ath:AT4G22100|ath:AT2G44450|ath:AT3G44300|ath:AT3…	832290|821333|829911|828299|829949|825317|829949|819053|828299|823854|821333|840543|829042|829911|828299|828896|828299|825450|823555|828896|829949|829949|819052|828299|828299|828299|819052|823555|823555|	http://www.genome.jp/kegg-bin/show_pathway?ath00460/ath:AT3G18080%09red/ath:AT3G61440%09red/ath:AT3G44300%09red/ath:AT4G22100%09red/ath:AT4G27830%09red/ath:AT5G22300%09red/ath:AT2G44460%09red/ath:AT3G47010%09red/ath:AT4G37930%09red/ath:AT4G29210%09red/ath:AT3G62750%09red/ath:AT4G37560%09red/ath:AT1G36370%09red/ath:AT2G44450%09red
Ubiquinone and other terpenoid-quinone biosynthesis	KEGG PATHWAY	ath00130	17	32	0.0277211	0.199442	BnaA02g11840D|BnaC08g18420D|BnaA01g13280D|BnaA05g19760D|BnaA03g49250D|BnaC09g14630D|BnaC02g13860D|BnaA01g22440D|BnaC08g36300D|BnaC05g30990D|BnaC06g08930D|BnaC01g15060D|BnaA05g12790D|BnaC02g16270D|BnaC02g18740D|BnaA05g27150D|BnaA05g36600D	ath:AT1G64970|ath:AT1G18870|ath:AT4G23590|ath:AT3G21240|ath:AT4G28410|ath:AT1G60550|ath:AT5G53970|ath:AT1G60600|ath:AT5G36160|ath:AT3G21230|ath:AT1G51680|ath:AT4G23590|ath:AT5G36160|ath:AT1G64970|ath:AT1G68890|ath:AT3G11945|ath:AT3G21230|	842805|838468|828459|821678|828958|842350|835480|842354|833613|821677|841593|828459|833613|842805|843222|5007993|821677|	http://www.genome.jp/kegg-bin/show_pathway?ath00130/ath:AT1G51680%09red/ath:AT5G36160%09red/ath:AT1G18870%09red/ath:AT1G60550%09red/ath:AT1G68890%09red/ath:AT4G23590%09red/ath:AT3G21230%09red/ath:AT3G11945%09red/ath:AT4G28410%09red/ath:AT1G60600%09red/ath:AT1G64970%09red/ath:AT5G53970%09red/ath:AT3G21240%09red
Brassinosteroid biosynthesis	KEGG PATHWAY	ath00905	7	8	0.0293297	0.199442	BnaC02g38080D|BnaC09g49790D|BnaA10g24860D|BnaAnng01430D|BnaA06g30720D|BnaAnng21530D|BnaC07g25950D	ath:AT3G30180|ath:AT5G05690|ath:AT5G05690|ath:AT5G05690|ath:AT3G30180|ath:AT3G30180|ath:AT3G30180|	822709|830453|830453|830453|822709|822709|822709|	http://www.genome.jp/kegg-bin/show_pathway?ath00905/ath:AT3G30180%09red/ath:AT5G05690%09red
Fructose and mannose metabolism	KEGG PATHWAY	ath00051	24	52	0.0326615	0.20218	BnaC04g33570D|BnaC03g60280D|BnaC08g46760D|BnaA09g43380D|BnaA01g15640D|BnaA06g37230D|BnaC04g26530D|BnaC08g45130D|BnaA04g04350D|BnaAnng40850D|BnaC03g17470D|BnaA07g25850D|BnaA08g16820D|BnaA04g12130D|BnaC08g35040D|BnaC01g00070D|BnaA08g29810D|BnaC08g48810D|BnaC08g35820D|BnaC09g32660D|BnaAnng17200D|BnaA09g21250D|BnaC07g47470D|BnaA04g12000D	ath:AT4G38970|ath:AT4G38970|ath:AT1G43670|ath:AT2G21170|ath:AT4G26530|ath:AT4G38970|ath:AT3G54050|ath:AT1G07110|ath:AT3G54050|ath:AT4G38970|ath:AT2G31390|ath:AT1G66430|ath:AT4G38970|ath:AT4G38970|ath:AT2G22480|ath:AT4G38970|ath:AT1G43670|ath:AT3G54050|ath:AT4G38970|ath:AT5G57655|ath:AT3G54050|ath:AT4G11980|ath:AT4G38970|ath:AT2G21170|	830052|830052|840953|816652|828759|830052|824572|837221|824572|830052|817697|842961|830052|830052|816781|830052|840953|824572|830052|835871|824572|826805|830052|816652|	http://www.genome.jp/kegg-bin/show_pathway?ath00051/ath:AT1G66430%09red/ath:AT3G54050%09red/ath:AT2G31390%09red/ath:AT2G21170%09red/ath:AT4G26530%09red/ath:AT1G43670%09red/ath:AT1G07110%09red/ath:AT4G11980%09red/ath:AT5G57655%09red/ath:AT2G22480%09red/ath:AT4G38970%09red
Biosynthesis of unsaturated fatty acids	KEGG PATHWAY	ath01040	18	36	0.0356788	0.20218	BnaAnng01400D|BnaC02g17470D|BnaC08g26140D|BnaA10g21780D|BnaC09g46070D|BnaA05g23690D|BnaA05g33500D|BnaC09g41580D|BnaC06g28830D|BnaA03g57540D|BnaC03g04350D|BnaA03g13590D|BnaA07g26670D|BnaC04g03030D|BnaC03g32070D|BnaC05g40970D|BnaA03g57550D|BnaC05g48250D	ath:AT5G05580|ath:AT1G67730|ath:AT3G55360|ath:AT5G10480|ath:AT5G10480|ath:AT3G15850|ath:AT3G02610|ath:AT3G02630|ath:AT1G67730|ath:AT3G15850|ath:AT5G10480|ath:AT2G29980|ath:AT1G67730|ath:AT2G43710|ath:AT4G00520|ath:AT3G12120|ath:AT3G15870|ath:AT3G02610|	830441|843098|824702|830912|830912|820828|820709|820773|843098|820828|830912|817548|843098|818973|827955|820387|820830|820709|	http://www.genome.jp/kegg-bin/show_pathway?ath01040/ath:AT3G15850%09red/ath:AT2G43710%09red/ath:AT1G67730%09red/ath:AT3G55360%09red/ath:AT2G29980%09red/ath:AT3G02630%09red/ath:AT4G00520%09red/ath:AT3G12120%09red/ath:AT5G10480%09red/ath:AT3G02610%09red/ath:AT3G15870%09red/ath:AT5G05580%09red
Tropane, piperidine and pyridine alkaloid biosynthesis	KEGG PATHWAY	ath00960	18	36	0.0356788	0.20218	BnaA03g54620D|BnaC08g02180D|BnaA10g04850D|BnaC02g28390D|BnaA03g49250D|BnaC04g14140D|BnaA05g12690D|BnaC08g36300D|BnaC05g05190D|BnaC04g14100D|BnaC03g26320D|BnaA05g11710D|BnaC01g15060D|BnaA05g12790D|BnaC04g14160D|BnaC02g13860D|BnaA03g51850D|BnaA01g13280D	ath:AT1G62810|ath:AT1G07450|ath:AT2G29330|ath:AT4G12290|ath:AT4G28410|ath:AT2G29320|ath:AT2G29320|ath:AT5G36160|ath:AT2G29330|ath:AT2G29320|ath:AT2G29320|ath:AT2G30970|ath:AT4G23590|ath:AT5G36160|ath:AT2G29320|ath:AT5G53970|ath:AT4G31990|ath:AT4G23590|	842580|837257|817482|826838|828958|817481|817481|833613|817482|817481|817481|817648|828459|833613|817481|835480|829330|828459|	http://www.genome.jp/kegg-bin/show_pathway?ath00960/ath:AT1G62810%09red/ath:AT5G36160%09red/ath:AT2G29320%09red/ath:AT4G23590%09red/ath:AT4G31990%09red/ath:AT2G29330%09red/ath:AT4G12290%09red/ath:AT4G28410%09red/ath:AT1G07450%09red/ath:AT5G53970%09red/ath:AT2G30970%09red
Nitrogen metabolism	KEGG PATHWAY	ath00910	20	42	0.039055	0.209664	BnaCnng10340D|BnaA04g07450D|BnaCnng05580D|BnaC03g15030D|BnaA02g02290D|BnaC01g01370D|BnaA05g33810D|BnaC03g54910D|BnaA02g12430D|BnaA05g22420D|BnaA07g38790D|BnaC03g15020D|BnaA06g38980D|BnaC08g07930D|BnaC05g48870D|BnaC02g07040D|BnaC04g29670D|BnaA01g00380D|BnaCnng23850D|BnaA10g26060D	ath:AT5G04140|ath:AT5G35630|ath:AT3G01500|ath:AT5G53460|ath:AT5G14740|ath:AT4G37560|ath:AT3G01500|ath:AT3G44300|ath:AT5G37600|ath:AT3G17820|ath:AT1G70410|ath:AT5G53460|ath:AT3G44300|ath:AT5G35630|ath:AT3G01500|ath:AT3G44300|ath:AT5G35630|ath:AT4G37560|ath:AT5G37600|ath:AT5G04140|	830292|833535|821134|835427|831326|829911|821134|823555|833738|821050|843377|835427|823555|833535|821134|823555|833535|829911|833738|830292|	http://www.genome.jp/kegg-bin/show_pathway?ath00910/ath:AT1G70410%09red/ath:AT3G44300%09red/ath:AT3G17820%09red/ath:AT5G53460%09red/ath:AT5G37600%09red/ath:AT5G14740%09red/ath:AT3G01500%09red/ath:AT5G04140%09red/ath:AT4G37560%09red/ath:AT5G35630%09red
DOWN
Protein processing in endoplasmic reticulum	KEGG PATHWAY	ath04141	163	220	1.00998e-24	1.16148e-22	BnaA05g35030D|BnaA07g19730D|BnaA03g26120D|BnaA03g56030D|BnaC01g16760D|BnaC09g41720D|BnaA07g33590D|BnaA06g03500D|BnaA09g07760D|BnaA04g16880D|BnaC09g41750D|BnaC08g26190D|BnaCnng37980D|BnaA09g15410D|BnaC06g17650D|BnaA04g13040D|BnaCnng55410D|BnaC08g30240D|BnaC04g46940D|BnaA07g12390D|BnaA09g00890D|BnaAnng07030D|BnaC06g38200D|BnaC07g50110D|BnaC05g01600D|BnaC04g51940D|BnaC04g04870D|BnaA10g26760D|BnaC08g…	ath:AT2G32920|ath:AT1G79940|ath:AT4G02570|ath:AT5G20570|ath:AT5G50460|ath:AT5G38470|ath:AT1G77510|ath:AT4G34210|ath:AT5G66680|ath:AT2G29070|ath:AT1G16190|ath:AT5G59300|ath:AT2G34250|ath:AT1G56330|ath:AT4G34210|ath:AT4G15410|ath:AT2G25700|ath:AT1G75950|ath:AT5G05470|ath:AT5G66680|ath:AT4G02570|ath:AT5G61790|ath:AT1G77510|ath:AT4G16660|ath:AT4G02570|ath:AT2G47470|ath:AT5G05470|ath:AT5G03160|ath:AT1…	817854|844334|825648|832179|835114|833835|844087|829569|836801|817455|838188|836048|817986|842086|829569|827210|817111|843928|830430|836801|825648|836301|844087|827367|825648|819360|830430|831917|838779|838406|837441|838406|827210|827367|824661|817556|821195|825823|824580|820438|832089|827210|842087|839355|827210|827210|836301|831917|841656|838604|819360|835114|825171|825434|824489|837441|832267|…	http://www.genome.jp/kegg-bin/show_pathway?ath04141/ath:AT4G02570%09red/ath:AT5G28540%09red/ath:AT3G60010%09red/ath:AT1G17280%09red/ath:AT3G60540%09red/ath:AT4G34210%09red/ath:AT5G35080%09red/ath:AT2G29070%09red/ath:AT5G51440%09red/ath:AT1G21750%09red/ath:AT5G03160%09red/ath:AT5G05470%09red/ath:AT1G16190%09red/ath:AT3G57340%09red/ath:AT1G56330%09red/ath:AT1G52260%09red/ath:AT3G12580%09red/ath:AT1…
Protein export	KEGG PATHWAY	ath03060	37	53	3.24138e-06	0.00018638	BnaC03g22370D|BnaA03g20980D|BnaC01g35840D|BnaA07g19730D|BnaC01g16760D|BnaA08g02950D|BnaC04g03960D|BnaA06g03460D|BnaC03g17190D|BnaA06g09990D|BnaC07g39190D|BnaA01g28550D|BnaCnng37980D|BnaC06g02320D|BnaA03g14210D|BnaA02g11680D|BnaA04g26040D|BnaC03g52150D|BnaA10g13270D|BnaC08g03210D|BnaA05g03460D|BnaC05g11610D|BnaCnng63570D|BnaA06g21420D|BnaC01g07800D|BnaC06g09860D|BnaC09g35750D|BnaC04g50100D|BnaA02g…	ath:AT2G39960|ath:AT3G60540|ath:AT1G52600|ath:AT1G79940|ath:AT5G50460|ath:AT1G48900|ath:AT3G60540|ath:AT5G49500|ath:AT5G28540|ath:AT1G15310|ath:AT5G50460|ath:AT1G52600|ath:AT2G34250|ath:AT5G49500|ath:AT5G28540|ath:AT5G50460|ath:AT3G60540|ath:AT5G61970|ath:AT5G60460|ath:AT1G48900|ath:AT2G43640|ath:AT1G15310|ath:AT2G43640|ath:AT5G61970|ath:AT4G30600|ath:AT1G52600|ath:AT5G60460|ath:AT3G60540|ath:AT5…	818583|825225|841692|844334|835114|841312|825225|835010|832950|838100|835114|841692|817986|835010|832950|835114|825225|836318|836167|841312|818966|838100|818966|836318|829183|841692|836167|825225|836318|817986|843093|820814|841312|835114|832950|832950|839805|	http://www.genome.jp/kegg-bin/show_pathway?ath03060/ath:AT5G28540%09red/ath:AT1G67680%09red/ath:AT5G60460%09red/ath:AT3G60540%09red/ath:AT4G30600%09red/ath:AT1G15310%09red/ath:AT1G48900%09red/ath:AT3G15710%09red/ath:AT5G50460%09red/ath:AT1G52600%09red/ath:AT2G34250%09red/ath:AT5G49500%09red/ath:AT5G61970%09red/ath:AT2G39960%09red/ath:AT1G79940%09red/ath:AT1G29310%09red/ath:AT2G43640%09red
Amino sugar and nucleotide sugar metabolism	KEGG PATHWAY	ath00520	60	122	2.13756e-05	0.000819397	BnaAnng39400D|BnaA03g06710D|BnaA03g37150D|BnaA10g27900D|BnaA10g22410D|BnaC07g38610D|BnaC01g05200D|BnaC09g46970D|BnaC04g39360D|BnaC06g27770D|Novel01190|BnaA08g08070D|BnaA05g01360D|BnaC04g41310D|BnaC01g15760D|BnaC03g08340D|BnaC06g17380D|BnaA03g06500D|Novel03026|BnaC01g12180D|BnaA09g22180D|BnaA04g17670D|BnaA08g24600D|BnaA07g26180D|BnaC04g45840D|BnaA06g04670D|BnaC02g43200D|BnaA06g11470D|BnaC05g21440D…	ath:AT4G20460|ath:AT5G17770|ath:AT3G24090|ath:AT1G06780|ath:AT5G09730|ath:AT4G23920|ath:AT4G33030|ath:AT5G09730|ath:AT2G27860|ath:AT5G09730|ath:AT1G78570|ath:AT1G31070|ath:AT2G46480|ath:AT2G30575|ath:AT4G23920|ath:AT5G17310|ath:AT3G59480|ath:AT5G17310|ath:AT4G20460|ath:AT4G20460|ath:AT4G10960|ath:AT2G30575|ath:AT1G12780|ath:AT5G09730|ath:AT2G38650|ath:AT1G08200|ath:AT5G64570|ath:AT1G78570|ath:AT1…	827794|831645|821995|837189|830833|828492|829440|830833|817332|830833|844193|839993|819257|817607|828492|831596|825117|831596|827794|827794|826696|817607|837834|830833|818447|837341|836578|844193|839660|837341|830833|820239|820239|831402|837341|837834|831926|834829|836578|817332|819257|844193|844193|838927|834475|821995|828492|835333|835258|818447|820474|831400|842622|827299|827299|835258|842622|…	http://www.genome.jp/kegg-bin/show_pathway?ath00520/ath:AT1G06780%09red/ath:AT1G23190%09red/ath:AT5G17310%09red/ath:AT2G38650%09red/ath:AT5G15470%09red/ath:AT1G78570%09red/ath:AT1G63180%09red/ath:AT5G17770%09red/ath:AT5G15490%09red/ath:AT4G00110%09red/ath:AT1G27680%09red/ath:AT4G33030%09red/ath:AT1G08200%09red/ath:AT3G02350%09red/ath:AT5G47780%09red/ath:AT2G27860%09red/ath:AT5G09730%09red/ath:AT4…
Phagosome	KEGG PATHWAY	ath04145	44	86	0.000130088	0.00374002	BnaAnng07030D|BnaA03g20980D|BnaAnng40540D|BnaA08g12170D|BnaC01g16760D|BnaA08g02320D|BnaA09g15400D|BnaC04g03960D|BnaA08g09560D|BnaC03g52250D|Novel01985|BnaCnng06700D|BnaC07g39190D|BnaC09g16150D|BnaC04g54460D|BnaCnng37980D|BnaA02g11680D|BnaC04g39820D|BnaCnng36540D|BnaA04g16460D|BnaA04g26040D|BnaA05g12490D|BnaA06g05290D|BnaA09g15970D|BnaC07g19560D|BnaC09g05410D|BnaA05g14990D|Novel01705|BnaA06g21300D…	ath:AT5G61790|ath:AT3G60540|ath:AT5G61790|ath:AT2G25610|ath:AT5G50460|ath:AT1G50010|ath:AT1G56340|ath:AT3G60540|ath:AT4G20890|ath:AT5G61790|ath:AT5G61790|ath:AT1G09210|ath:AT5G50460|ath:AT1G56340|ath:AT2G29550|ath:AT2G34250|ath:AT5G50460|ath:AT2G28520|ath:AT5G44340|ath:AT2G28520|ath:AT3G60540|ath:AT2G29550|ath:AT1G09210|ath:AT1G56340|ath:AT5G46860|ath:AT5G61790|ath:AT1G52280|ath:AT4G14960|ath:AT5…	836301|825225|836301|817101|835114|841425|842087|825225|827837|836301|836301|837441|835114|842087|817504|817986|835114|817400|834459|817400|825225|817504|837441|842087|834730|836301|841658|827154|836301|817504|836167|836167|825225|817986|831546|817504|837441|817400|836301|817400|837441|835114|817400|839805|	http://www.genome.jp/kegg-bin/show_pathway?ath04145/ath:AT2G28520%09red/ath:AT1G52280%09red/ath:AT5G60460%09red/ath:AT3G60540%09red/ath:AT4G20890%09red/ath:AT5G46860%09red/ath:AT1G50010%09red/ath:AT1G56340%09red/ath:AT5G50460%09red/ath:AT2G34250%09red/ath:AT5G16830%09red/ath:AT4G14960%09red/ath:AT1G09210%09red/ath:AT5G61790%09red/ath:AT2G25610%09red/ath:AT5G44340%09red/ath:AT1G29310%09red/ath:AT2…
Glycerolipid metabolism	KEGG PATHWAY	ath00561	31	52	0.000171639	0.00394769	BnaA03g49040D|BnaA09g43530D|BnaC01g05200D|BnaC05g04490D|BnaC05g18900D|BnaCnng51890D|BnaA10g27550D|BnaA09g08200D|BnaA09g15750D|BnaC09g53950D|BnaC02g42690D|BnaA01g05080D|BnaA10g13450D|BnaC07g50560D|BnaC09g08430D|BnaA10g04260D|BnaCnng03870D|BnaA06g22880D|BnaA07g35620D|BnaA08g00900D|BnaA09g29890D|BnaA06g16950D|BnaC03g50590D|BnaA03g50320D|BnaC09g17210D|BnaC04g45690D|BnaCnng12150D|BnaC01g03300D|BnaC07g…	ath:AT4G28130|ath:AT2G20900|ath:AT4G33030|ath:AT1G06520|ath:AT1G23800|ath:AT4G31780|ath:AT5G01220|ath:AT5G20410|ath:AT5G42870|ath:AT5G60620|ath:AT5G63770|ath:AT4G31780|ath:AT5G60620|ath:AT4G28130|ath:AT5G20410|ath:AT1G06520|ath:AT5G01220|ath:AT5G63770|ath:AT1G80460|ath:AT1G54100|ath:AT1G23800|ath:AT3G48000|ath:AT5G63770|ath:AT4G30580|ath:AT5G42870|ath:AT2G38110|ath:AT3G48000|ath:AT5G60620|ath:AT4…	828928|816624|829440|837163|838991|829306|831888|832163|834298|836183|836497|829306|836183|828928|832163|837163|831888|836497|844385|841849|838991|823955|836497|829181|834298|818389|823955|836183|829181|818389|831888|	http://www.genome.jp/kegg-bin/show_pathway?ath00561/ath:AT1G80460%09red/ath:AT1G06520%09red/ath:AT5G01220%09red/ath:AT1G54100%09red/ath:AT4G28130%09red/ath:AT4G33030%09red/ath:AT1G23800%09red/ath:AT5G60620%09red/ath:AT4G31780%09red/ath:AT4G30580%09red/ath:AT2G38110%09red/ath:AT5G63770%09red/ath:AT2G20900%09red/ath:AT5G42870%09red/ath:AT3G48000%09red/ath:AT5G20410%09red
Ubiquitin mediated proteolysis	KEGG PATHWAY	ath04120	59	149	0.00204498	0.0391954	BnaAnng27830D|BnaC07g18980D|BnaA03g26120D|BnaC08g30220D|BnaC08g44850D|BnaA06g14260D|BnaCnng55410D|BnaC05g15660D|BnaA08g09840D|BnaA06g03500D|BnaA09g29300D|BnaA07g11620D|BnaAnng29500D|BnaC09g49100D|BnaA03g55110D|BnaCnng12340D|BnaC02g24630D|BnaAnng29490D|BnaA03g56030D|BnaC09g23630D|BnaC07g41060D|BnaC08g30240D|BnaC08g30290D|BnaC03g13840D|BnaA02g04940D|BnaA09g00890D|BnaA08g23200D|BnaC08g30260D|BnaA10g…	ath:AT4G34210|ath:AT5G46210|ath:AT4G02570|ath:AT1G20140|ath:AT1G06590|ath:AT1G20140|ath:AT2G25700|ath:AT2G25700|ath:AT4G21100|ath:AT4G34210|ath:AT1G26830|ath:AT2G25700|ath:AT1G20140|ath:AT5G06460|ath:AT5G05080|ath:AT1G26830|ath:AT2G41980|ath:AT4G34470|ath:AT5G20570|ath:AT4G11920|ath:AT4G27880|ath:AT1G75950|ath:AT3G60010|ath:AT5G56150|ath:AT5G20570|ath:AT4G02570|ath:AT1G17280|ath:AT1G75950|ath:AT5…	829569|834663|825648|838604|837170|838604|817111|817111|827857|829569|839226|817111|838604|830534|830390|839226|818798|829598|832179|826799|828901|843928|825171|835714|832179|825648|838300|843928|830534|843928|839226|829569|841471|825171|826799|817111|827857|838300|843928|825648|834160|836048|829463|836048|843928|832179|834663|832179|829833|817111|843928|820879|825648|831392|825171|835714|825648|…	http://www.genome.jp/kegg-bin/show_pathway?ath04120/ath:AT4G02570%09red/ath:AT3G60010%09red/ath:AT1G17280%09red/ath:AT4G34210%09red/ath:AT3G16320%09red/ath:AT1G50490%09red/ath:AT5G20570%09red/ath:AT4G11920%09red/ath:AT5G41580%09red/ath:AT4G36800%09red/ath:AT5G59300%09red/ath:AT1G06590%09red/ath:AT5G46210%09red/ath:AT2G41980%09red/ath:AT1G20140%09red/ath:AT2G25700%09red/ath:AT1G75950%09red/ath:AT5…
RNA transport	KEGG PATHWAY	ath03013	63	169	0.0045098	0.0668976	BnaC04g55530D|BnaC07g09820D|BnaA05g05450D|BnaC05g11790D|BnaA08g21430D|BnaC03g15540D|BnaC05g02310D|BnaA05g08940D|BnaC04g48380D|BnaA08g15500D|BnaC08g28270D|BnaC06g06670D|BnaC06g19410D|BnaA08g22750D|BnaA06g32100D|BnaC04g04370D|BnaA03g48300D|BnaC04g40850D|BnaA10g24290D|BnaC04g02340D|BnaAnng41030D|BnaCnng39960D|BnaA08g19040D|BnaC04g46940D|BnaC04g10340D|BnaC08g19730D|BnaCnng08310D|BnaC05g50180D|BnaA06g…	ath:AT3G56150|ath:AT1G29550|ath:AT5G05470|ath:AT1G15470|ath:AT1G21160|ath:AT1G54270|ath:AT1G04170|ath:AT2G34970|ath:AT1G54380|ath:AT4G37130|ath:AT2G41620|ath:AT1G53900|ath:AT1G80670|ath:AT2G32765|ath:AT2G46290|ath:AT2G45640|ath:AT4G26840|ath:AT2G30050|ath:AT2G40290|ath:AT1G54380|ath:AT3G16380|ath:AT4G37130|ath:AT1G24310|ath:AT5G05470|ath:AT2G34970|ath:AT1G21160|ath:AT1G74700|ath:AT2G32765|ath:AT1…	824781|839832|830430|838117|838712|841868|839238|818061|841879|829867|818760|841828|844406|817837|819237|819172|828791|817556|818621|841879|820885|829867|839047|830430|818061|838712|843809|817837|841828|843507|819108|6241016|841576|817556|839832|817837|839238|817837|838117|844406|830430|818587|843507|820885|841879|837560|839832|830430|839238|843507|842943|817556|818587|3770677|839832|817556|83811…	http://www.genome.jp/kegg-bin/show_pathway?ath03013/ath:AT1G24310%09red/ath:AT3G56900%09red/ath:AT1G21160%09red/ath:AT3G07300%09red/ath:AT1G54380%09red/ath:AT5G05470%09red/ath:AT2G46290%09red/ath:AT3G56150%09red/ath:AT1G80670%09red/ath:AT2G40290%09red/ath:AT2G30050%09red/ath:AT1G54270%09red/ath:AT5G20920%09red/ath:AT5G19485%09red/ath:AT4G26840%09red/ath:AT1G04170%09red/ath:AT2G45640%09red/ath:AT5…
Glycerophospholipid metabolism	KEGG PATHWAY	ath00564	36	83	0.00465375	0.0668976	BnaA03g49040D|BnaA09g43530D|BnaC04g17290D|BnaA04g22130D|BnaA05g14430D|BnaC05g04490D|BnaA03g50320D|BnaC09g17210D|BnaC03g71920D|BnaA09g15750D|BnaC09g53950D|BnaC02g42690D|BnaC08g44190D|BnaAnng18990D|BnaA10g13450D|BnaC04g45860D|BnaC07g50560D|BnaAnng16260D|BnaA10g04260D|BnaA06g22880D|BnaCnng35860D|BnaC09g22540D|BnaCnng54530D|BnaC03g50590D|BnaA07g15060D|BnaA01g15140D|BnaC03g25360D|BnaA09g20200D|BnaC04g…	ath:AT4G28130|ath:AT2G20900|ath:AT2G26830|ath:AT2G38670|ath:AT2G06925|ath:AT1G06520|ath:AT4G30580|ath:AT5G42870|ath:AT2G32260|ath:AT5G42870|ath:AT5G60620|ath:AT5G63770|ath:AT2G32260|ath:AT1G52570|ath:AT5G60620|ath:AT2G38670|ath:AT4G28130|ath:AT2G32260|ath:AT1G06520|ath:AT5G63770|ath:AT2G06925|ath:AT4G04870|ath:AT4G35790|ath:AT5G63770|ath:AT5G40610|ath:AT4G25970|ath:AT2G45670|ath:AT4G04870|ath:AT2…	828928|816624|817224|818449|815261|837163|829181|834298|817786|834298|836183|836497|817786|841689|836183|818449|828928|817786|837163|836497|815261|825825|829733|836497|834060|828703|819175|825825|818389|819175|836183|829181|817224|834060|818389|834060|	http://www.genome.jp/kegg-bin/show_pathway?ath00564/ath:AT2G26830%09red/ath:AT2G38670%09red/ath:AT1G06520%09red/ath:AT4G25970%09red/ath:AT2G06925%09red/ath:AT4G04870%09red/ath:AT4G28130%09red/ath:AT5G40610%09red/ath:AT2G45670%09red/ath:AT5G60620%09red/ath:AT2G32260%09red/ath:AT1G52570%09red/ath:AT4G35790%09red/ath:AT2G38110%09red/ath:AT5G63770%09red/ath:AT2G20900%09red/ath:AT5G42870%09red/ath:AT4…
Galactose metabolism	KEGG PATHWAY	ath00052	24	55	0.0175853	0.202426	BnaC07g38610D|Novel03569|BnaA01g04110D|BnaC01g15760D|BnaC03g08340D|BnaA01g15330D|BnaA03g06500D|BnaA09g22180D|BnaA08g24600D|BnaC08g15730D|BnaC05g20020D|BnaC09g10840D|BnaA09g30060D|BnaAnng07590D|BnaA01g13540D|BnaC08g33440D|BnaA10g18960D|BnaA09g10850D|BnaA03g47840D|BnaCnng14830D|BnaC07g40110D|BnaC01g18170D|BnaCnng01190D|BnaC05g49280D	ath:AT4G23920|ath:AT5G15140|ath:AT4G32840|ath:AT4G23920|ath:AT5G17310|ath:AT3G52840|ath:AT5G17310|ath:AT4G10960|ath:AT1G12780|ath:AT1G12780|ath:AT5G15140|ath:AT1G62660|ath:AT1G23190|ath:AT2G36190|ath:AT4G23920|ath:AT5G52560|ath:AT5G15140|ath:AT1G63180|ath:AT3G52840|ath:AT1G63180|ath:AT3G52840|ath:AT3G52840|ath:AT4G01970|ath:AT1G12780|	828492|831366|829420|828492|831596|824450|831596|826696|837834|837834|831366|842563|838927|818191|828492|835333|831366|842622|824450|842622|824450|824450|828186|837834|	http://www.genome.jp/kegg-bin/show_pathway?ath00052/ath:AT5G52560%09red/ath:AT1G62660%09red/ath:AT1G23190%09red/ath:AT5G17310%09red/ath:AT3G52840%09red/ath:AT1G12780%09red/ath:AT1G63180%09red/ath:AT4G32840%09red/ath:AT4G10960%09red/ath:AT2G36190%09red/ath:AT5G15140%09red/ath:AT4G23920%09red/ath:AT4G01970%09red
Fatty acid degradation	KEGG PATHWAY	ath00071	19	40	0.0176023	0.202426	BnaC05g18900D|BnaA07g20920D|BnaA03g57590D|BnaC03g74060D|BnaA09g24180D|BnaCnng12150D|BnaC03g49190D|BnaC03g18470D|BnaC06g20910D|BnaA02g30030D|BnaA08g00900D|BnaA05g17940D|BnaA09g29890D|BnaC05g24910D|BnaA02g32360D|BnaA09g02880D|BnaA06g24040D|BnaC08g05970D|BnaA06g16950D	ath:AT1G23800|ath:AT1G77590|ath:AT3G23790|ath:AT3G23790|ath:AT1G32780|ath:AT3G48000|ath:AT5G65110|ath:AT2G33150|ath:AT1G77590|ath:AT5G48230|ath:AT1G54100|ath:AT1G32780|ath:AT1G23800|ath:AT1G32780|ath:AT5G24760|ath:AT5G48230|ath:AT5G65110|ath:AT4G22110|ath:AT3G48000|	838991|844094|821961|821961|840172|823955|836635|817876|844094|834876|841849|840172|838991|840172|832545|834876|836635|828300|823955|	http://www.genome.jp/kegg-bin/show_pathway?ath00071/ath:AT2G33150%09red/ath:AT1G54100%09red/ath:AT1G32780%09red/ath:AT1G23800%09red/ath:AT4G22110%09red/ath:AT5G24760%09red/ath:AT3G23790%09red/ath:AT5G48230%09red/ath:AT5G65110%09red/ath:AT3G48000%09red/ath:AT1G77590%09red
Basal transcription factors	KEGG PATHWAY	ath03022	23	55	0.0279884	0.284962	BnaC08g11660D|BnaCnng57200D|BnaC04g24270D|BnaC07g32780D|BnaC04g01970D|BnaA09g20810D|BnaC09g53830D|BnaA10g12130D|BnaA07g36550D|BnaC07g11690D|BnaC07g38900D|BnaA09g02610D|BnaA09g02600D|BnaA04g02440D|BnaA01g26290D|BnaC04g24280D|BnaA03g55430D|BnaAnng16720D|BnaA08g14710D|BnaA05g02290D|BnaC01g33630D|BnaA06g13960D|BnaCnng65330D	ath:AT4G24440|ath:AT1G75510|ath:AT2G41630|ath:AT3G52270|ath:AT2G41630|ath:AT4G12610|ath:AT5G59230|ath:AT5G59230|ath:AT1G27720|ath:AT1G27720|ath:AT4G24440|ath:AT3G29380|ath:AT3G29380|ath:AT3G10330|ath:AT1G32750|ath:AT3G10330|ath:AT1G55520|ath:AT4G12610|ath:AT4G24440|ath:AT2G41630|ath:AT1G32750|ath:AT1G75510|ath:AT4G34340|	828546|843887|818761|824392|818761|826874|836041|836041|839665|839665|828546|822598|822598|820195|840169|820195|841999|826874|828546|818761|840169|843887|829584|	http://www.genome.jp/kegg-bin/show_pathway?ath03022/ath:AT1G27720%09red/ath:AT4G12610%09red/ath:AT5G59230%09red/ath:AT1G32750%09red/ath:AT3G29380%09red/ath:AT3G10330%09red/ath:AT1G55520%09red/ath:AT4G24440%09red/ath:AT1G75510%09red/ath:AT3G52270%09red/ath:AT2G41630%09red/ath:AT4G34340%09red
beta-Alanine metabolism	KEGG PATHWAY	ath00410	18	40	0.0297351	0.284962	BnaA05g12590D|BnaC05g18900D|BnaA05g12620D|BnaA03g19980D|BnaC04g48360D|BnaCnng12150D|BnaA07g09800D|BnaA08g28670D|BnaA04g24530D|BnaA08g00900D|BnaA09g29890D|BnaA06g16950D|BnaC02g26940D|BnaC05g18910D|BnaA02g12280D|BnaA03g04460D|BnaC03g23740D|BnaA09g54560D	ath:AT2G30660|ath:AT1G23800|ath:AT2G30660|ath:AT2G43020|ath:AT2G42490|ath:AT3G48000|ath:AT1G23820|ath:AT1G06550|ath:AT2G42490|ath:AT1G54100|ath:AT1G23800|ath:AT3G48000|ath:AT1G65840|ath:AT1G23820|ath:AT1G65840|ath:AT5G13700|ath:AT2G42490|ath:AT1G23820|	817616|838991|817616|818904|818849|823955|838993|837166|818849|841849|838991|823955|842894|838993|842894|831215|818849|838993|	http://www.genome.jp/kegg-bin/show_pathway?ath00410/ath:AT1G65840%09red/ath:AT1G54100%09red/ath:AT2G42490%09red/ath:AT1G06550%09red/ath:AT1G23800%09red/ath:AT5G13700%09red/ath:AT1G23820%09red/ath:AT2G43020%09red/ath:AT3G48000%09red/ath:AT2G30660%09red
Cutin, suberine and wax biosynthesis	KEGG PATHWAY	ath00073	12	23	0.0333315	0.294855	BnaC07g49710D|BnaCnng59260D|BnaA02g32980D|BnaA07g15220D|BnaC02g41740D|BnaA05g27080D|BnaAnng14390D|BnaC06g13400D|BnaA03g39540D|Novel01942|Novel01772|BnaA04g10770D	ath:AT5G23190|ath:AT5G41040|ath:AT5G23190|ath:AT5G41040|ath:AT5G23190|ath:AT3G11980|ath:AT3G56700|ath:AT5G41040|ath:AT5G23190|ath:AT3G11980|ath:AT3G11980|ath:AT5G41040|	832383|834106|832383|834106|832383|820372|824837|834106|832383|820372|820372|834106|	http://www.genome.jp/kegg-bin/show_pathway?ath00073/ath:AT5G23190%09red/ath:AT5G41040%09red/ath:AT3G56700%09red/ath:AT3G11980%09red

## Sheet: SA
ALL DEG
NONE
UP
#Term	Database	ID	Input number	Background number	P-Value	Corrected P-Value	Input	KEGG_ID/KO	Entrez_ID	Hyperlink
Starch and sucrose metabolism	KEGG PATHWAY	ath00500	126	188	3.50975e-05	0.00317061	BnaC01g34490D|BnaC04g03740D|BnaA07g05790D|BnaA07g17330D|BnaC07g34180D|BnaC03g10290D|BnaA09g51890D|BnaCnng74430D|BnaA01g34430D|BnaA04g12690D|BnaA06g08310D|BnaA05g12940D|BnaA07g22680D|BnaC07g47330D|BnaA09g28990D|BnaA06g30890D|Novel04996|BnaA10g18710D|BnaC08g32460D|BnaA07g04740D|BnaA10g15850D|BnaA04g00400D|BnaA06g02800D|BnaA07g06190D|BnaA08g11860D|BnaA02g04800D|BnaCnng00430D|BnaA03g03230D|BnaA05g158…	ath:AT3G18080|ath:AT2G44450|ath:AT3G23920|ath:AT3G57510|ath:AT4G17090|ath:AT5G20830|ath:AT4G00490|ath:AT5G37180|ath:AT3G03250|ath:AT2G22190|ath:AT1G12240|ath:AT5G37180|ath:AT1G73370|ath:AT4G39210|ath:AT1G26560|ath:AT3G29320|ath:AT2G32860|ath:AT5G15470|ath:AT4G27830|ath:AT5G48300|ath:AT5G19220|ath:AT4G27830|ath:AT1G50460|ath:AT3G23820|ath:AT4G33220|ath:AT5G20280|ath:AT5G48300|ath:AT5G11110|ath:AT1…	821333|819052|821975|824918|827419|832206|827959|833692|821313|816753|837777|833692|843672|830076|839196|822590|817847|831400|828896|834883|832042|828896|841468|821965|829458|832150|834883|830979|841468|836578|832042|830135|830874|821499|816753|834883|830368|829458|830379|816697|817847|839197|832497|830379|819056|843672|830135|820474|827419|829458|818212|821975|827498|831769|824918|821965|822590|…	http://www.genome.jp/kegg-bin/show_pathway?ath00500/ath:AT2G40840%09red/ath:AT4G27830%09red/ath:AT2G32860%09red/ath:AT5G15470%09red/ath:AT3G25140%09red/ath:AT3G47010%09red/ath:AT4G24620%09red/ath:AT5G03650%09red/ath:AT4G39210%09red/ath:AT3G03640%09red/ath:AT4G29130%09red/ath:AT3G23820%09red/ath:AT1G50460%09red/ath:AT1G66430%09red/ath:AT4G22100%09red/ath:AT4G39770%09red/ath:AT3G05620%09red/ath:AT3…
Porphyrin and chlorophyll metabolism	KEGG PATHWAY	ath00860	44	45	6.15188e-05	0.00317061	BnaC03g05980D|BnaAnng19090D|BnaA09g14820D|BnaA01g19280D|Novel01534|BnaA08g27540D|BnaC08g47900D|BnaC02g30620D|BnaCnng49000D|BnaCnng19750D|BnaC04g01370D|BnaA01g14420D|BnaC03g36180D|BnaAnng25090D|BnaC08g27800D|BnaCnng14630D|BnaC05g49040D|BnaA07g17040D|BnaC02g01240D|BnaA09g16640D|BnaC08g32870D|BnaAnng03490D|BnaA03g47110D|BnaA01g09270D|BnaC06g35410D|BnaC07g40900D|BnaC04g03820D|BnaA09g27040D|BnaC05g061…	ath:AT5G13630|ath:AT1G44446|ath:AT1G58290|ath:AT3G51820|ath:AT1G58290|ath:AT1G03630|ath:AT4G16690|ath:AT5G43860|ath:AT1G74470|ath:AT5G43860|ath:AT2G40490|ath:AT4G25080|ath:AT3G09150|ath:AT4G13250|ath:AT3G56940|ath:AT4G13250|ath:AT1G04620|ath:AT3G56940|ath:AT5G08280|ath:AT5G43860|ath:AT2G30390|ath:AT3G44880|ath:AT4G25080|ath:AT4G18480|ath:AT1G74470|ath:AT4G27440|ath:AT2G44520|ath:AT2G26670|ath:AT1…	831207|841029|842198|824345|842198|839009|827371|834408|843788|834408|818644|828611|820069|826942|824861|826942|839472|824861|830724|834408|817589|823622|828611|827580|843788|828853|819059|817208|837374|826942|824345|839009|824345|843788|826942|831207|842198|843788|830372|841029|829854|828611|817589|824345|	http://www.genome.jp/kegg-bin/show_pathway?ath00860/ath:AT1G44446%09red/ath:AT4G27440%09red/ath:AT3G09150%09red/ath:AT2G44520%09red/ath:AT1G74470%09red/ath:AT2G40490%09red/ath:AT1G03630%09red/ath:AT4G37000%09red/ath:AT4G25080%09red/ath:AT4G18480%09red/ath:AT3G51820%09red/ath:AT1G04620%09red/ath:AT1G08520%09red/ath:AT4G16690%09red/ath:AT2G26670%09red/ath:AT4G13250%09red/ath:AT5G08280%09red/ath:AT5…
Carbon metabolism	KEGG PATHWAY	ath01200	151	243	9.95124e-05	0.00317061	BnaA03g36910D|BnaC04g33570D|BnaC03g03680D|BnaC03g60280D|BnaA02g00100D|BnaA01g15640D|BnaA09g08370D|BnaC03g35770D|BnaC02g46710D|BnaC02g36240D|BnaA01g20810D|BnaA08g16820D|BnaC05g18600D|BnaC03g61150D|BnaC02g00740D|BnaAnng11450D|BnaC03g45180D|BnaA04g27920D|BnaCnng40160D|BnaC05g24200D|BnaA04g12130D|BnaC08g40850D|BnaC08g35990D|BnaC08g03580D|BnaA09g46780D|BnaA08g07000D|BnaC09g20370D|BnaA01g00380D|BnaC06g…	ath:AT3G22960|ath:AT4G38970|ath:AT5G08570|ath:AT4G38970|ath:AT5G09660|ath:AT4G26530|ath:AT2G14170|ath:AT3G10050|ath:AT1G79550|ath:AT3G26650|ath:AT3G49360|ath:AT4G38970|ath:AT1G70580|ath:AT4G37930|ath:AT5G09660|ath:AT5G28020|ath:AT2G13360|ath:AT5G38430|ath:AT3G55410|ath:AT1G32060|ath:AT4G38970|ath:AT3G26650|ath:AT2G21170|ath:AT1G48430|ath:AT3G26650|ath:AT1G32060|ath:AT5G47720|ath:AT4G37560|ath:AT1…	821870|830052|830758|830052|830825|828759|815903|820166|844293|822277|824098|830052|843395|829949|830825|832872|815822|833830|824707|840098|830052|822277|816652|841264|822277|840098|834823|829911|841765|838850|837465|841468|843395|822277|841468|818860|820723|840098|831039|838342|815822|843395|835598|833830|834823|821482|829911|824572|830052|830758|840895|819567|824746|820166|824746|833830|832873|…	http://www.genome.jp/kegg-bin/show_pathway?ath01200/ath:AT3G14940%09red/ath:AT5G56630%09red/ath:AT5G11670%09red/ath:AT3G19480%09red/ath:AT3G06810%09red/ath:AT3G04120%09red/ath:AT1G13700%09red/ath:AT3G04940%09red/ath:AT1G42970%09red/ath:AT2G21170%09red/ath:AT5G40650%09red/ath:AT5G47720%09red/ath:AT4G14880%09red/ath:AT4G29130%09red/ath:AT1G50460%09red/ath:AT5G61410%09red/ath:AT1G48430%09red/ath:AT3…
DNA replication	KEGG PATHWAY	ath03030	46	50	0.000111249	0.00317061	BnaC03g31160D|BnaA03g02300D|BnaC03g74400D|Novel03433|BnaC03g47260D|BnaC04g54440D|BnaA06g23100D|BnaA03g39900D|BnaCnng01120D|BnaA09g49520D|BnaA09g05560D|BnaA03g22490D|BnaA02g23900D|BnaC08g00310D|BnaA02g13280D|BnaA04g14440D|BnaA03g38130D|BnaC08g45280D|BnaC04g27660D|Novel05269|BnaAnng09140D|BnaC05g05150D|BnaA09g00540D|BnaC03g03340D|BnaC09g26550D|BnaC06g00930D|BnaC03g46410D|BnaA03g26370D|BnaA03g39110D…	ath:AT4G02060|ath:AT5G08020|ath:AT2G07690|ath:AT5G26680|ath:AT5G22110|ath:AT1G07370|ath:AT5G63960|ath:AT5G61000|ath:AT4G02060|ath:AT1G07370|ath:AT5G61000|ath:AT5G22110|ath:AT5G45400|ath:AT1G52950|ath:AT1G67630|ath:AT2G24490|ath:AT2G07690|ath:AT1G07370|ath:AT1G52950|ath:AT2G24490|ath:AT1G52950|ath:AT2G29570|ath:AT4G02060|ath:AT5G08020|ath:AT1G52950|ath:AT1G44900|ath:AT2G16440|ath:AT4G02060|ath:AT2…	828153|830696|815415|832721|832272|837249|836517|836221|828153|837249|836221|832272|834576|841728|843086|816985|815415|837249|841728|816985|841728|817506|828153|830696|841728|841056|816142|828153|816142|834670|841056|843086|837333|834492|817953|841056|836845|834670|841728|844083|841056|843052|834492|816985|834670|836845|	http://www.genome.jp/kegg-bin/show_pathway?ath03030/ath:AT5G45400%09red/ath:AT5G67100%09red/ath:AT2G24490%09red/ath:AT5G26680%09red/ath:AT4G02060%09red/ath:AT2G29570%09red/ath:AT2G16440%09red/ath:AT5G61000%09red/ath:AT1G67630%09red/ath:AT5G63960%09red/ath:AT1G07370%09red/ath:AT5G44635%09red/ath:AT1G44900%09red/ath:AT1G67320%09red/ath:AT1G77470%09red/ath:AT1G08130%09red/ath:AT5G46280%09red/ath:AT2…
Metabolic pathways	KEGG PATHWAY	ath01100	885	1861	0.000424171	0.0096711	BnaC03g56190D|BnaA10g24820D|BnaC05g05190D|BnaC09g04540D|BnaC01g35830D|BnaC05g06170D|BnaA02g03770D|BnaA08g16560D|BnaA01g13520D|BnaC05g30830D|BnaC02g36240D|BnaC03g10290D|BnaC04g10580D|BnaA01g33740D|BnaC05g18600D|BnaA04g01030D|BnaA04g07250D|BnaA07g26770D|BnaA03g56490D|BnaC02g46810D|BnaCnng66150D|BnaC03g66190D|BnaA07g26680D|BnaA06g09070D|BnaC02g48890D|BnaA03g14790D|BnaC09g08190D|BnaA04g00400D|BnaC07g…	ath:AT3G46940|ath:AT5G05730|ath:AT2G29330|ath:AT5G24160|ath:AT3G15730|ath:AT1G08520|ath:AT5G17920|ath:AT2G21790|ath:AT4G23900|ath:AT3G21160|ath:AT3G26650|ath:AT5G20830|ath:AT2G34630|ath:AT3G03980|ath:AT1G70580|ath:AT3G60880|ath:AT4G12800|ath:AT1G68010|ath:AT2G38400|ath:AT4G10340|ath:AT5G21105|ath:AT4G34350|ath:AT1G67740|ath:AT1G14290|ath:AT5G66570|ath:AT2G31955|ath:AT1G20020|ath:AT4G27830|ath:AT1…	823847|830457|817482|832482|820816|837374|831660|816715|828490|821668|822277|832206|818028|819553|843395|825259|826892|843129|818421|826626|832235|829585|843099|837990|836789|817754|838591|828896|838850|831144|819175|830611|843498|843395|819804|820630|838151|841468|830135|830874|836558|824263|831144|839009|838216|839871|830283|843395|821143|833830|834823|821482|837704|843116|837704|836845|830368|…	http://www.genome.jp/kegg-bin/show_pathway?ath01100/ath:AT4G08900%09red/ath:AT4G28750%09red/ath:AT2G20340%09red/ath:AT1G79550%09red/ath:AT2G40490%09red/ath:AT1G31800%09red/ath:AT3G30775%09red/ath:AT4G00400%09red/ath:AT2G27860%09red/ath:AT5G35170%09red/ath:AT4G34650%09red/ath:AT3G54440%09red/ath:AT1G22440%09red/ath:AT4G37970%09red/ath:AT1G70560%09red/ath:AT4G37870%09red/ath:AT2G39770%09red/ath:AT3…
Plant hormone signal transduction	KEGG PATHWAY	ath04075	156	271	0.000998259	0.0189669	BnaC05g41830D|BnaC04g47620D|BnaA03g34150D|BnaA08g01770D|BnaC05g17260D|BnaC03g21070D|Novel04384|BnaA08g27770D|BnaC01g00010D|BnaA06g40640D|BnaC05g50280D|BnaC07g43240D|Novel05402|BnaA06g34810D|BnaC07g44750D|BnaA09g51800D|BnaA03g23150D|BnaA01g23120D|BnaC02g23710D|Novel00253|BnaA05g20870D|BnaA10g04840D|BnaA04g21830D|BnaA01g05490D|BnaA01g17750D|BnaC02g47760D|BnaC06g22290D|BnaC08g36050D|BnaA07g12290D|Bn…	ath:AT3G11410|ath:AT2G41370|ath:AT3G16360|ath:AT1G51950|ath:AT1G01360|ath:AT2G38120|ath:AT1G07430|ath:AT1G04250|ath:AT4G38860|ath:AT4G39400|ath:AT1G19830|ath:AT4G31320|ath:AT1G59940|ath:AT2G01570|ath:AT4G34160|ath:AT4G00710|ath:AT2G21050|ath:AT1G60940|ath:AT1G75580|ath:AT5G20730|ath:AT3G19290|ath:AT1G07430|ath:AT2G38120|ath:AT4G39400|ath:AT4G16110|ath:AT2G01760|ath:AT1G75580|ath:AT2G21050|ath:AT5…	820314|818735|820883|841623|838452|818390|837255|839568|830041|830095|838570|829259|842288|814686|829564|828025|816640|842385|843893|832196|821463|837255|818390|830095|827297|814707|843893|816640|836822|839506|820314|814707|840158|829259|824169|841623|839706|837255|830760|820314|830095|818581|829547|829564|817956|829676|838452|816640|832607|835221|832196|838572|830162|818390|825473|839549|829322|…	http://www.genome.jp/kegg-bin/show_pathway?ath04075/ath:AT1G19830%09red/ath:AT5G20730%09red/ath:AT1G32640%09red/ath:AT2G41370%09red/ath:AT1G04550%09red/ath:AT4G13790%09red/ath:AT2G46690%09red/ath:AT4G26120%09red/ath:AT1G17550%09red/ath:AT5G66880%09red/ath:AT1G19840%09red/ath:AT4G00880%09red/ath:AT1G03430%09red/ath:AT5G13370%09red/ath:AT1G75580%09red/ath:AT5G45110%09red/ath:AT1G01360%09red/ath:AT5…
Ubiquinone and other terpenoid-quinone biosynthesis	KEGG PATHWAY	ath00130	29	32	0.00227779	0.0370954	BnaA10g04310D|BnaA03g49250D|BnaA09g49870D|BnaC08g44820D|BnaA02g20230D|BnaA08g10670D|BnaC05g23530D|BnaA02g20140D|BnaAnng31450D|BnaA05g19760D|BnaA07g19580D|BnaC02g13860D|BnaA03g36140D|BnaA05g12790D|BnaAnng37410D|BnaC03g65220D|BnaC08g18420D|BnaA08g22340D|BnaA09g26010D|Novel01467|BnaC07g41280D|BnaAnng37050D|BnaA01g13280D|BnaA01g09810D|BnaA07g01280D|BnaC05g30950D|BnaC02g18740D|BnaAnng35150D|BnaA02g099…	ath:AT1G06570|ath:AT4G28410|ath:AT1G06570|ath:AT1G06570|ath:AT1G64970|ath:AT4G23590|ath:AT1G30520|ath:AT1G64970|ath:AT4G23590|ath:AT3G21240|ath:AT3G63410|ath:AT5G53970|ath:AT3G21230|ath:AT5G36160|ath:AT4G23590|ath:AT4G23590|ath:AT1G18870|ath:AT1G18870|ath:AT1G30520|ath:AT1G74710|ath:AT4G28410|ath:AT4G23590|ath:AT4G23590|ath:AT4G19010|ath:AT2G18950|ath:AT3G21240|ath:AT1G68890|ath:AT4G23590|ath:AT5…	837168|828958|837168|837168|842805|828459|839932|842805|828459|821678|825516|835480|821677|833613|828459|828459|838468|838468|839932|843810|828958|828459|828459|827639|816412|821678|843222|828459|835480|	http://www.genome.jp/kegg-bin/show_pathway?ath00130/ath:AT2G18950%09red/ath:AT5G36160%09red/ath:AT1G30520%09red/ath:AT3G21240%09red/ath:AT4G23590%09red/ath:AT1G74710%09red/ath:AT1G06570%09red/ath:AT3G21230%09red/ath:AT4G19010%09red/ath:AT1G18870%09red/ath:AT4G28410%09red/ath:AT1G64970%09red/ath:AT5G53970%09red/ath:AT1G68890%09red/ath:AT3G63410%09red
Glycine, serine and threonine metabolism	KEGG PATHWAY	ath00260	49	69	0.0036386	0.0518501	BnaA03g38340D|BnaC06g43710D|BnaC08g06270D|BnaC06g26170D|BnaA01g00170D|BnaAnng13240D|BnaAnng37640D|BnaC03g35770D|BnaA08g15890D|BnaC04g34370D|BnaA07g24840D|BnaA09g08290D|BnaC05g24600D|BnaAnng41580D|BnaA07g35670D|BnaC05g18600D|BnaA02g19770D|BnaC03g61150D|BnaA08g22970D|BnaC03g21300D|BnaA07g26770D|BnaC03g45180D|BnaC07g03750D|BnaA03g56490D|BnaA01g03860D|BnaC01g38880D|BnaA07g19850D|BnaA05g32920D|BnaC03g…	ath:AT2G13360|ath:AT1G70580|ath:AT1G70580|ath:AT1G68010|ath:AT4G37930|ath:AT2G38400|ath:AT1G32470|ath:AT3G10050|ath:AT4G37930|ath:AT5G38530|ath:AT1G68010|ath:AT2G13360|ath:AT1G32470|ath:AT5G28237|ath:AT1G80380|ath:AT1G70580|ath:AT1G80380|ath:AT4G37930|ath:AT1G17745|ath:AT2G38400|ath:AT1G68010|ath:AT2G13360|ath:AT1G08630|ath:AT2G38400|ath:AT2G26080|ath:AT3G10050|ath:AT1G80380|ath:AT3G04520|ath:AT1…	815822|843395|843395|843129|829949|818421|840141|820166|829949|833841|843129|815822|840141|2746023|844378|843395|844378|829949|838352|818421|843129|815822|837385|818421|817149|820166|844378|819608|841849|837385|821482|844378|815822|820166|821482|843129|842580|838352|843395|843395|820166|826838|837733|840141|844378|837385|843395|837385|844378|	http://www.genome.jp/kegg-bin/show_pathway?ath00260/ath:AT1G08630%09red/ath:AT5G28237%09red/ath:AT3G10050%09red/ath:AT5G38530%09red/ath:AT1G70580%09red/ath:AT2G38400%09red/ath:AT4G12290%09red/ath:AT1G68010%09red/ath:AT1G54100%09red/ath:AT3G19480%09red/ath:AT1G32470%09red/ath:AT2G26080%09red/ath:AT1G11860%09red/ath:AT4G37930%09red/ath:AT2G13360%09red/ath:AT1G17745%09red/ath:AT1G80380%09red/ath:AT3…
Biosynthesis of secondary metabolites	KEGG PATHWAY	ath01110	480	995	0.00486596	0.0616355	BnaA10g24820D|BnaC05g05190D|BnaA02g03770D|BnaA01g13520D|BnaA03g53180D|BnaC04g10580D|BnaC05g18600D|BnaA04g01030D|BnaA07g26770D|BnaC03g66190D|BnaA01g00150D|BnaA04g00400D|BnaC07g13740D|BnaC08g23140D|BnaA09g31220D|BnaCnng00430D|BnaA05g15840D|BnaC08g22410D|BnaA07g01280D|BnaA08g27540D|BnaC06g43710D|BnaA09g18440D|BnaCnng46320D|BnaC08g41990D|BnaC09g50410D|BnaA08g31590D|BnaA01g29560D|BnaC08g27800D|BnaAnng…	ath:AT5G05730|ath:AT2G29330|ath:AT5G17920|ath:AT4G23900|ath:AT4G35090|ath:AT2G34630|ath:AT1G70580|ath:AT3G60880|ath:AT1G68010|ath:AT4G34350|ath:AT4G37970|ath:AT4G27830|ath:AT1G22440|ath:AT3G51820|ath:AT1G70580|ath:AT5G48300|ath:AT1G50460|ath:AT3G50990|ath:AT2G18950|ath:AT1G03630|ath:AT1G70580|ath:AT5G47720|ath:AT1G11600|ath:AT1G11600|ath:AT5G04885|ath:AT1G11600|ath:AT3G14130|ath:AT3G56940|ath:AT4…	830457|817482|831660|828490|829661|818028|843395|825259|843129|829585|829953|828896|838850|824345|843395|834883|841468|824263|816412|839009|843395|834823|837704|837704|830368|837704|820630|824861|828459|838991|831400|831645|819059|842465|829978|830052|836098|844284|839009|822590|842198|828733|833471|839395|829907|817205|828300|830765|836478|827371|840141|828299|822222|842805|838275|843788|815822|…	http://www.genome.jp/kegg-bin/show_pathway?ath01110/ath:AT3G26280%09red/ath:AT3G04520%09red/ath:AT4G28680%09red/ath:AT4G15560%09red/ath:AT4G08900%09red/ath:AT3G06810%09red/ath:AT3G17390%09red/ath:AT3G04120%09red/ath:AT3G47010%09red/ath:AT4G24620%09red/ath:AT1G79550%09red/ath:AT5G47720%09red/ath:AT4G29130%09red/ath:AT5G05690%09red/ath:AT1G01710%09red/ath:AT4G39980%09red/ath:AT2G26640%09red/ath:AT2…
Mismatch repair	KEGG PATHWAY	ath03430	29	39	0.0146781	0.161475	BnaA03g26360D|BnaC04g54440D|BnaA06g23100D|BnaA03g39900D|BnaCnng23780D|BnaA09g49520D|BnaA09g05560D|BnaA02g23900D|BnaC08g00310D|BnaA04g14440D|BnaC08g45280D|BnaC07g45660D|BnaC04g27660D|Novel05269|BnaAnng09140D|BnaA03g02300D|BnaC05g05150D|BnaC03g03340D|BnaA08g22780D|BnaC09g26550D|BnaA06g04600D|BnaC08g17770D|BnaCnng68560D|BnaA01g22970D|BnaCnng09860D|BnaC04g44260D|BnaC04g28640D|BnaC03g31100D|BnaC04g363…	ath:AT4G02070|ath:AT1G07370|ath:AT5G63960|ath:AT5G61000|ath:AT3G18524|ath:AT1G07370|ath:AT5G61000|ath:AT5G45400|ath:AT1G52950|ath:AT2G24490|ath:AT1G07370|ath:AT4G35520|ath:AT1G52950|ath:AT2G24490|ath:AT1G52950|ath:AT5G08020|ath:AT2G29570|ath:AT5G08020|ath:AT1G18090|ath:AT1G52950|ath:AT1G08130|ath:AT1G18090|ath:AT4G02460|ath:AT3G24495|ath:AT1G77470|ath:AT2G33845|ath:AT1G52950|ath:AT4G02070|ath:AT2…	828147|837249|836517|836221|821383|837249|836221|834576|841728|816985|837249|829704|841728|816985|841728|830696|817506|830696|838389|841728|837333|838389|827997|822040|844083|817953|841728|828147|816985|	http://www.genome.jp/kegg-bin/show_pathway?ath03430/ath:AT2G29570%09red/ath:AT1G18090%09red/ath:AT5G61000%09red/ath:AT3G18524%09red/ath:AT5G45400%09red/ath:AT4G02460%09red/ath:AT2G33845%09red/ath:AT1G77470%09red/ath:AT4G35520%09red/ath:AT3G24495%09red/ath:AT5G63960%09red/ath:AT1G07370%09red/ath:AT1G08130%09red/ath:AT1G52950%09red/ath:AT2G24490%09red/ath:AT4G02070%09red/ath:AT5G08020%09red
Pentose and glucuronate interconversions	KEGG PATHWAY	ath00040	51	81	0.0155809	0.161475	Novel01204|BnaA02g04440D|BnaC06g15490D|BnaC03g74840D|BnaCnng43240D|BnaA08g11860D|BnaA10g02830D|BnaA09g33470D|BnaA07g17330D|BnaA01g03620D|BnaA08g28010D|BnaA10g23990D|BnaA03g01590D|BnaA09g53800D|BnaC09g48610D|BnaA01g34430D|BnaC08g08780D|BnaC03g01870D|BnaA05g28930D|BnaA03g46920D|BnaCnng60750D|BnaC03g01880D|BnaAnng14170D|BnaA02g29680D|BnaA01g14130D|BnaA03g40170D|BnaC08g00880D|BnaA02g30490D|BnaC05g262…	ath:AT4G13710|ath:AT5G19730|ath:AT3G54920|ath:AT5G63180|ath:AT5G61410|ath:AT4G33220|ath:AT1G04680|ath:AT3G53190|ath:AT3G57510|ath:AT4G33220|ath:AT1G04680|ath:AT5G61410|ath:AT5G04970|ath:AT1G23800|ath:AT5G61410|ath:AT3G03250|ath:AT4G13710|ath:AT5G04970|ath:AT3G09540|ath:AT4G24780|ath:AT4G02330|ath:AT5G04970|ath:AT1G67750|ath:AT3G29090|ath:AT4G24780|ath:AT5G61410|ath:AT1G04680|ath:AT5G48900|ath:AT4…	827005|832093|824657|836439|836262|829458|839452|824485|824918|829458|839452|836262|830379|838991|836262|821313|827005|830379|820111|828580|828064|830379|843100|822556|828580|836262|839452|834948|829782|839197|843100|819728|839452|843100|841820|824485|826936|828580|824918|843100|827005|828064|836262|819886|832093|827005|832093|829458|824657|836262|828580|	http://www.genome.jp/kegg-bin/show_pathway?ath00040/ath:AT4G36250%09red/ath:AT3G54920%09red/ath:AT3G07010%09red/ath:AT1G67750%09red/ath:AT5G61410%09red/ath:AT4G13710%09red/ath:AT1G26570%09red/ath:AT4G02330%09red/ath:AT4G33220%09red/ath:AT3G05620%09red/ath:AT3G09540%09red/ath:AT3G03250%09red/ath:AT5G04970%09red/ath:AT3G29090%09red/ath:AT1G53830%09red/ath:AT5G48900%09red/ath:AT4G13210%09red/ath:AT1…
Tyrosine metabolism	KEGG PATHWAY	ath00350	28	40	0.0269894	0.253958	BnaA10g04310D|BnaA03g49250D|BnaA09g49870D|BnaA07g33310D|BnaC08g44820D|BnaA08g10670D|BnaA09g16810D|BnaC09g20710D|BnaAnng31450D|BnaC02g28390D|BnaC07g00580D|BnaC02g13860D|BnaA05g12790D|BnaAnng37410D|BnaC03g65220D|BnaC07g13740D|BnaC07g41280D|BnaC03g69740D|BnaA01g13280D|BnaAnng37050D|BnaC09g10380D|BnaA01g08240D|BnaA07g10480D|BnaC07g42600D|BnaAnng36660D|BnaA01g11910D|BnaAnng35150D|BnaA02g09960D	ath:AT1G06570|ath:AT4G28410|ath:AT1G06570|ath:AT1G77120|ath:AT1G06570|ath:AT4G23590|ath:AT5G43940|ath:AT2G02390|ath:AT4G23590|ath:AT4G12290|ath:AT2G20340|ath:AT5G53970|ath:AT5G36160|ath:AT4G23590|ath:AT4G23590|ath:AT1G22440|ath:AT4G28410|ath:AT1G62810|ath:AT4G23590|ath:AT4G23590|ath:AT2G20340|ath:AT4G28680|ath:AT1G22440|ath:AT4G31990|ath:AT1G22430|ath:AT4G22110|ath:AT4G23590|ath:AT5G53970|	837168|828958|837168|844047|837168|828459|834417|814770|828459|826838|816553|835480|833613|828459|828459|838850|828958|842580|828459|828459|816553|828986|838850|829330|838849|828300|828459|835480|	http://www.genome.jp/kegg-bin/show_pathway?ath00350/ath:AT1G62810%09red/ath:AT1G22440%09red/ath:AT5G36160%09red/ath:AT4G28680%09red/ath:AT4G12290%09red/ath:AT4G23590%09red/ath:AT4G31990%09red/ath:AT1G06570%09red/ath:AT1G77120%09red/ath:AT2G20340%09red/ath:AT2G02390%09red/ath:AT4G28410%09red/ath:AT1G22430%09red/ath:AT5G53970%09red/ath:AT4G22110%09red/ath:AT5G43940%09red
Alanine, aspartate and glutamate metabolism	KEGG PATHWAY	ath00250	32	48	0.0294036	0.253958	BnaA03g38340D|BnaC06g43710D|BnaC08g06270D|BnaA10g16660D|BnaA08g23190D|BnaA09g08290D|BnaA05g22420D|BnaC04g29670D|BnaCnng23850D|BnaC05g18600D|BnaAnng13240D|BnaC03g21300D|Novel02312|BnaC03g45180D|BnaA03g56490D|BnaA08g20540D|Novel05265|BnaC09g39680D|BnaA01g02440D|BnaC09g08540D|BnaA01g24820D|BnaA05g17430D|BnaC05g31580D|BnaAnng22050D|BnaA09g31220D|BnaC05g30410D|BnaC03g53730D|BnaC07g42600D|BnaA02g12430D…	ath:AT2G13360|ath:AT1G70580|ath:AT1G70580|ath:AT5G18170|ath:AT1G17290|ath:AT2G13360|ath:AT3G17820|ath:AT5G35630|ath:AT5G37600|ath:AT1G70580|ath:AT2G38400|ath:AT2G38400|ath:AT5G07440|ath:AT2G13360|ath:AT2G38400|ath:AT1G70580|ath:AT5G35630|ath:AT5G18170|ath:AT4G34740|ath:AT2G13360|ath:AT3G22200|ath:AT3G22200|ath:AT5G07440|ath:AT1G70580|ath:AT1G70580|ath:AT3G22200|ath:AT3G47340|ath:AT4G31990|ath:AT5…	815822|843395|843395|831935|838301|815822|821050|833535|833738|843395|818421|818421|830635|815822|818421|843395|833535|831935|829626|815822|821784|821784|830635|843395|843395|821784|823888|829330|833738|842908|821784|838301|	http://www.genome.jp/kegg-bin/show_pathway?ath00250/ath:AT5G07440%09red/ath:AT3G17820%09red/ath:AT1G65960%09red/ath:AT1G17290%09red/ath:AT3G22200%09red/ath:AT2G38400%09red/ath:AT4G31990%09red/ath:AT4G34740%09red/ath:AT5G18170%09red/ath:AT5G37600%09red/ath:AT3G47340%09red/ath:AT2G13360%09red/ath:AT5G35630%09red/ath:AT1G70580%09red
Ether lipid metabolism	KEGG PATHWAY	ath00565	20	26	0.0311878	0.253958	BnaA09g46210D|BnaA05g23740D|BnaA03g56890D|BnaC07g45790D|BnaC05g48190D|BnaA02g32010D|BnaC01g35830D|BnaCnng35860D|BnaA01g28530D|BnaA06g08550D|BnaC05g37540D|BnaAnng08250D|BnaC04g50380D|BnaA05g14430D|BnaC03g01530D|BnaA06g16410D|BnaC03g25360D|BnaA05g32880D|BnaA04g26330D|BnaC02g40590D	ath:AT1G13560|ath:AT3G15730|ath:AT2G45670|ath:AT4G35790|ath:AT3G03520|ath:AT5G25370|ath:AT3G15730|ath:AT2G06925|ath:AT3G15730|ath:AT1G13560|ath:AT3G15730|ath:AT4G35790|ath:AT2G45670|ath:AT2G06925|ath:AT5G04040|ath:AT3G48610|ath:AT2G45670|ath:AT3G03520|ath:AT2G45670|ath:AT5G25370|	837917|820816|819175|829733|821244|832609|820816|815261|820816|837917|820816|829733|819175|815261|830283|824021|819175|821244|819175|832609|	http://www.genome.jp/kegg-bin/show_pathway?ath00565/ath:AT1G13560%09red/ath:AT5G04040%09red/ath:AT2G06925%09red/ath:AT2G45670%09red/ath:AT3G15730%09red/ath:AT5G25370%09red/ath:AT4G35790%09red/ath:AT3G48610%09red/ath:AT3G03520%09red
Isoquinoline alkaloid biosynthesis	KEGG PATHWAY	ath00950	18	23	0.0359526	0.27324	BnaC09g10380D|BnaA01g13280D|BnaC02g28390D|BnaA03g49250D|BnaC07g00580D|BnaC02g13860D|BnaC07g42600D|BnaAnng31450D|BnaC07g41280D|BnaC03g69740D|BnaA05g12790D|BnaAnng37410D|BnaC03g65220D|BnaA08g10670D|BnaAnng37050D|BnaAnng35150D|BnaA02g09960D|BnaA01g08240D	ath:AT2G20340|ath:AT4G23590|ath:AT4G12290|ath:AT4G28410|ath:AT2G20340|ath:AT5G53970|ath:AT4G31990|ath:AT4G23590|ath:AT4G28410|ath:AT1G62810|ath:AT5G36160|ath:AT4G23590|ath:AT4G23590|ath:AT4G23590|ath:AT4G23590|ath:AT4G23590|ath:AT5G53970|ath:AT4G28680|	816553|828459|826838|828958|816553|835480|829330|828459|828958|842580|833613|828459|828459|828459|828459|828459|835480|828986|	http://www.genome.jp/kegg-bin/show_pathway?ath00950/ath:AT1G62810%09red/ath:AT5G36160%09red/ath:AT4G28680%09red/ath:AT4G12290%09red/ath:AT4G23590%09red/ath:AT4G31990%09red/ath:AT2G20340%09red/ath:AT4G28410%09red/ath:AT5G53970%09red
Fructose and mannose metabolism	KEGG PATHWAY	ath00051	33	52	0.0420692	0.299743	BnaC04g33570D|BnaC08g22580D|BnaC03g60280D|BnaA09g43380D|BnaC09g10170D|BnaA01g15640D|BnaA06g37230D|BnaC08g45130D|BnaA04g04350D|BnaAnng40850D|BnaA07g25850D|BnaA09g10080D|BnaC08g48810D|BnaC06g43510D|BnaC06g03640D|BnaA04g12130D|BnaC08g35990D|BnaC03g49790D|BnaC06g03650D|BnaC01g00070D|BnaA03g10690D|BnaC07g47470D|BnaAnng15770D|BnaA06g02800D|BnaC08g35820D|BnaAnng17200D|BnaA05g15840D|BnaAnng29210D|BnaA08g…	ath:AT4G38970|ath:AT3G51160|ath:AT4G38970|ath:AT2G21170|ath:AT4G29130|ath:AT4G26530|ath:AT4G38970|ath:AT1G07110|ath:AT3G54050|ath:AT4G38970|ath:AT1G66430|ath:AT4G29130|ath:AT3G54050|ath:AT1G66430|ath:AT1G50460|ath:AT4G38970|ath:AT2G21170|ath:AT5G64380|ath:AT1G50460|ath:AT4G38970|ath:AT5G56630|ath:AT4G38970|ath:AT1G07110|ath:AT1G50460|ath:AT4G38970|ath:AT3G54050|ath:AT1G50460|ath:AT4G26270|ath:AT4…	830052|824280|830052|816652|829034|828759|830052|837221|824572|830052|842961|829034|824572|842961|841468|830052|816652|836559|841468|830052|835764|830052|837221|841468|830052|824572|841468|828733|830052|818562|818562|824280|818562|	http://www.genome.jp/kegg-bin/show_pathway?ath00051/ath:AT1G50460%09red/ath:AT1G66430%09red/ath:AT3G54050%09red/ath:AT3G51160%09red/ath:AT5G64380%09red/ath:AT4G26530%09red/ath:AT2G21170%09red/ath:AT1G07110%09red/ath:AT4G26270%09red/ath:AT2G39770%09red/ath:AT5G56630%09red/ath:AT4G29130%09red/ath:AT4G38970%09red
Tryptophan metabolism	KEGG PATHWAY	ath00380	29	45	0.0481489	0.322881	BnaC02g40130D|BnaA09g18440D|BnaC02g40120D|Novel00241|Novel02923|BnaC02g19980D|BnaA06g20180D|BnaA03g53180D|BnaA09g53800D|BnaA07g37870D|BnaC01g05950D|BnaC03g65530D|BnaCnng40160D|BnaA01g14030D|BnaC05g26280D|BnaC09g20370D|BnaC03g54910D|BnaA06g38980D|BnaC07g45360D|BnaC02g40420D|BnaA01g04490D|BnaC03g78230D|BnaC02g07040D|BnaA09g52790D|BnaC03g54410D|BnaA01g08170D|BnaC08g46370D|BnaA08g10870D|BnaA02g14990D	ath:AT5G26000|ath:AT5G47720|ath:AT5G26000|ath:AT5G26000|ath:AT1G48910|ath:AT1G70560|ath:AT3G43600|ath:AT4G35090|ath:AT1G23800|ath:AT3G55410|ath:AT4G32540|ath:AT4G35090|ath:AT3G55410|ath:AT4G24670|ath:AT4G36250|ath:AT5G47720|ath:AT3G44300|ath:AT3G44300|ath:AT4G35090|ath:AT5G26000|ath:AT4G32540|ath:AT1G54100|ath:AT3G44300|ath:AT5G26000|ath:AT3G43600|ath:AT4G28720|ath:AT3G43600|ath:AT4G35090|ath:AT1…	832669|834823|832669|832669|841313|843393|823457|829661|838991|824707|829389|829661|824707|828569|829782|834823|823555|823555|829661|832669|829389|841849|823555|832669|823457|828993|823457|829661|843393|	http://www.genome.jp/kegg-bin/show_pathway?ath00380/ath:AT3G43600%09red/ath:AT4G24670%09red/ath:AT4G36250%09red/ath:AT1G54100%09red/ath:AT1G48910%09red/ath:AT1G23800%09red/ath:AT3G44300%09red/ath:AT1G70560%09red/ath:AT5G26000%09red/ath:AT4G28720%09red/ath:AT5G47720%09red/ath:AT3G55410%09red/ath:AT4G35090%09red/ath:AT4G32540%09red
DOWN
Phagosome	KEGG PATHWAY	ath04145	83	86	0.0230129	1	BnaA09g47480D|BnaAnng07030D|BnaA02g36630D|BnaC03g08040D|BnaA03g20980D|BnaA02g33600D|BnaAnng40540D|BnaA06g16430D|BnaCnng06700D|BnaC01g15530D|BnaA03g15760D|BnaA07g18020D|BnaA09g15400D|BnaA06g35880D|BnaC04g03960D|BnaA08g09560D|BnaC03g52250D|BnaA09g31890D|Novel01985|BnaA02g31320D|Novel01705|BnaC03g69320D|BnaA03g58730D|BnaA06g26420D|BnaC09g16150D|BnaC08g20330D|BnaCnng37980D|BnaA05g04540D|BnaA01g19510D…	ath:AT1G11890|ath:AT5G61790|ath:AT5G45970|ath:AT5G16830|ath:AT3G60540|ath:AT5G62880|ath:AT5G61790|ath:AT3G48570|ath:AT1G09210|ath:AT4G23710|ath:AT2G34250|ath:AT3G58730|ath:AT1G56340|ath:AT5G46860|ath:AT3G60540|ath:AT4G20890|ath:AT5G61790|ath:AT3G51300|ath:AT5G61790|ath:AT4G14960|ath:AT4G14960|ath:AT1G52280|ath:AT4G23710|ath:AT5G23860|ath:AT1G56340|ath:AT3G48570|ath:AT2G34250|ath:AT3G60540|ath:AT2…	837737|836301|834637|831546|825225|836408|836301|824017|837441|828471|817986|825042|842087|834730|825225|827837|836301|824293|836301|827154|827154|841658|828471|832451|842087|824017|817986|825225|816290|841658|820647|836167|841658|816290|843911|835114|838579|817400|842087|842344|825225|826558|836301|826558|817986|837441|842087|835114|842725|824293|825042|843934|836301|841658|816290|828471|817986|…	http://www.genome.jp/kegg-bin/show_pathway?ath04145/ath:AT3G48570%09red/ath:AT3G60540%09red/ath:AT5G46860%09red/ath:AT1G75780%09red/ath:AT4G14960%09red/ath:AT1G76030%09red/ath:AT1G11890%09red/ath:AT3G14270%09red/ath:AT2G28520%09red/ath:AT1G52280%09red/ath:AT5G62880%09red/ath:AT5G23860%09red/ath:AT5G50460%09red/ath:AT5G61790%09red/ath:AT4G09720%09red/ath:AT2G29550%09red/ath:AT4G23710%09red/ath:AT1…
