# Supplementary material for: Transcriptomic and Proteomic Analysis of Shaan2A Cytoplasmic Male Sterility and Its Maintainer Line in Brassica napus
Source: Front Plant Sci. 2019 Mar 4;10:252. doi: 10.3389/fpls.2019.00252 (PMC6409359; doi:10.3389/fpls.2019.00252)
Supplement: TABLE S5 — Expression levels of genes in the nine GO categories associated with anther and pollen development at the YB stage. [file Table_5.XLSX]

## Sheet: Sheet1
Gene ID	readcount_2A_YB	readcount_2B_YB	log2FoldChange	significant	Ath_ID	Annotation
BnaA10g00600D	0.350159	4134.66	-13.527	TRUE	AT1G01280	cytochrome P450, family 703, subfamily A, polypeptide 2 (CYP703A2)
BnaC05g00670D	0.350159	3537.07	-13.302	TRUE	AT1G01280	cytochrome P450, family 703, subfamily A, polypeptide 2 (CYP703A2)
BnaCnng08630D	1.74766	2185.43	-10.288	TRUE	AT1G01280	cytochrome P450, family 703, subfamily A, polypeptide 2 (CYP703A2)
BnaA06g35310D	93.0348	322.095	-1.7916	TRUE	AT1G01690	putative recombination initiation defects 3 (PRD3)
BnaA10g00300D	168.817	234.726	-0.47552	FALSE	AT1G01690	putative recombination initiation defects 3 (PRD3)
BnaC05g00390D	111.232	139.753	-0.3293	FALSE	AT1G01690	putative recombination initiation defects 3 (PRD3)
BnaC07g20440D	106.077	218.118	-1.04	TRUE	AT1G01690	putative recombination initiation defects 3 (PRD3)
BnaA04g21720D	8.02836	5831.46	-9.5045	TRUE	AT1G02050	LESS ADHESIVE POLLEN 6 (LAP6)
BnaC04g45570D	1.04479	6620.92	-12.63	TRUE	AT1G02050	LESS ADHESIVE POLLEN 6 (LAP6)
BnaA10g00110D	1279.44	1209.87	0.080659	FALSE	AT1G02065	squamosa promoter binding protein-like 8 (SPL8)
BnaC05g00110D	334.492	343.923	-0.040115	FALSE	AT1G02065	squamosa promoter binding protein-like 8 (SPL8)
BnaC05g00120D	121.527	146.519	-0.26981	FALSE	AT1G02065	squamosa promoter binding protein-like 8 (SPL8)
BnaCnng09040D	1923.67	1669.88	0.20412	FALSE	AT1G02065	squamosa promoter binding protein-like 8 (SPL8)
BnaA08g28380D	2.81716	768.784	-8.0922	TRUE	AT1G05690	BTB and TAZ domain protein 3 (BT3)
BnaC05g03830D	0	288.256	#NAME?	TRUE	AT1G05690	BTB and TAZ domain protein 3 (BT3)
BnaC08g01420D	4.90164	476.643	-6.6035	TRUE	AT1G05690	BTB and TAZ domain protein 3 (BT3)
BnaA10g04260D	1.77237	180.365	-6.6691	TRUE	AT1G06520	glycerol-3-phosphate acyltransferase 1 (GPAT1)
BnaC05g04490D	4.89341	336.181	-6.1023	TRUE	AT1G06520	glycerol-3-phosphate acyltransferase 1 (GPAT1)
BnaA08g28920D	0	0.271186	#NAME?	FALSE	AT1G07340	sugar transporter 2 (STP2)
BnaA10g04790D	0	12.1121	#NAME?	FALSE	AT1G07340	sugar transporter 2 (STP2)
BnaC05g05120D	0	33.0875	#NAME?	TRUE	AT1G07340	sugar transporter 2 (STP2)
BnaC08g02110D	0	0.271186	#NAME?	FALSE	AT1G07340	sugar transporter 2 (STP2)
BnaC05g28280D	2.16568	6679.08	-11.591	TRUE	AT1G33430	Galactosyltransferase family protein
BnaCnng54730D	3.95962	6921.52	-10.772	TRUE	AT1G33430	Galactosyltransferase family protein
BnaC05g31820D	0	0	NA	NA	AT1G34210	somatic embryogenesis receptor-like kinase 2 (SERK2)
BnaC09g25020D	0.360946	0	Inf	FALSE	AT1G34210	somatic embryogenesis receptor-like kinase 2 (SERK2)
BnaA07g05890D	111.236	437.082	-1.9743	TRUE	AT1G34355	PARALLEL SPINDLE 1 (PS1)
BnaA08g06420D	72.258	88.3557	-0.29017	FALSE	AT1G34355	PARALLEL SPINDLE 1 (PS1)
BnaA10g09600D	241.317	476.812	-0.98249	TRUE	AT1G34355	PARALLEL SPINDLE 1 (PS1)
BnaAnng02280D	0	0	NA	NA	AT1G34355	PARALLEL SPINDLE 1 (PS1)
BnaC06g08200D	0	0	NA	NA	AT1G34355	PARALLEL SPINDLE 1 (PS1)
BnaC07g48210D	261.369	220.287	0.2467	FALSE	AT1G34355	PARALLEL SPINDLE 1 (PS1)
BnaC08g06940D	34.3623	43.5821	-0.34291	FALSE	AT1G34355	PARALLEL SPINDLE 1 (PS1)
BnaC09g31940D	303.886	377.579	-0.31325	FALSE	AT1G34355	PARALLEL SPINDLE 1 (PS1)
BnaA09g10680D	2.16568	10174.2	-12.198	TRUE	AT1G62940	acyl-CoA synthetase 5 (ACOS5)
BnaC09g10950D	27.5335	17036.7	-9.2732	TRUE	AT1G62940	acyl-CoA synthetase 5 (ACOS5)
BnaA09g10850D	3.82136	140.943	-5.2049	TRUE	AT1G63180	UDP-D-glucose/UDP-D-galactose 4-epimerase 3 (UGE3)
BnaC07g18040D	0	0.353978	#NAME?	FALSE	AT1G63180	UDP-D-glucose/UDP-D-galactose 4-epimerase 3 (UGE3)
BnaCnng14830D	10.2156	43.1315	-2.078	TRUE	AT1G63180	UDP-D-glucose/UDP-D-galactose 4-epimerase 3 (UGE3)
BnaCnng21690D	0	0	NA	NA	AT1G63180	UDP-D-glucose/UDP-D-galactose 4-epimerase 3 (UGE3)
BnaA07g28010D	4.22858	4896.81	-10.177	TRUE	AT1G69500	cytochrome P450, family 704, subfamily B, polypeptide 1 (CYP704B1)
BnaC06g30690D	1.41142	4835.54	-11.742	TRUE	AT1G69500	cytochrome P450, family 704, subfamily B, polypeptide 1 (CYP704B1)
BnaA02g15540D	0	0	NA	NA	AT1G71830	somatic embryogenesis receptor-like kinase 1 (SERK1)
BnaA07g23390D	236.796	310.679	-0.39178	FALSE	AT1G71830	somatic embryogenesis receptor-like kinase 1 (SERK1)
BnaA07g29610D	324.444	377.537	-0.21865	FALSE	AT1G71830	somatic embryogenesis receptor-like kinase 1 (SERK1)
BnaC02g20780D	0.700317	0	Inf	FALSE	AT1G71830	somatic embryogenesis receptor-like kinase 1 (SERK1)
BnaC06g32810D	284.557	372.739	-0.38945	FALSE	AT1G71830	somatic embryogenesis receptor-like kinase 1 (SERK1)
BnaCnng07810D	212.568	263.151	-0.30797	FALSE	AT1G71830	somatic embryogenesis receptor-like kinase 1 (SERK1)
BnaA05g23170D	0	1.08474	#NAME?	FALSE	AT1G77390	CYCLIN A1
BnaA07g33530D	38.0391	153.627	-2.0139	TRUE	AT1G77390	CYCLIN A1
BnaC02g13720D	0.692082	0.353978	0.96728	FALSE	AT1G77390	CYCLIN A1
BnaC06g38120D	82.9285	372.586	-2.1676	TRUE	AT1G77390	CYCLIN A1
BnaCnng40230D	0.341923	1.08474	-1.6656	FALSE	AT1G77390	CYCLIN A1
BnaA03g39400D	0.360946	2962.42	-13.003	TRUE	AT2G16910	ABORTED MICROSPORES (AMS)
BnaA07g03340D	3.54984	3386.31	-9.8977	TRUE	AT2G16910	ABORTED MICROSPORES (AMS)
BnaC03g46740D	1.80473	2316.11	-10.326	TRUE	AT2G16910	ABORTED MICROSPORES (AMS)
BnaC07g05950D	1.06382	4109.09	-11.915	TRUE	AT2G16910	ABORTED MICROSPORES (AMS)
BnaA09g40540D	2653.35	1953.93	0.44144	TRUE	AT2G26330	ERECTA (ER)
BnaC08g32980D	2292.56	1816.47	0.33583	FALSE	AT2G26330	ERECTA (ER)
BnaC08g33020D	4.89909	4.20903	0.21903	FALSE	AT2G26330	ERECTA (ER)
BnaA03g20470D	241.732	210.308	0.2009	FALSE	AT2G43790	MAP kinase 6 (MPK6)
BnaA05g03550D	314.751	293.676	0.099988	FALSE	AT2G43790	MAP kinase 6 (MPK6)
BnaA09g38010D	0	0	NA	NA	AT2G43790	MAP kinase 6 (MPK6)
BnaC03g24480D	501.385	497.503	0.011214	FALSE	AT2G43790	MAP kinase 6 (MPK6)
BnaC03g24500D	0	1.41591	#NAME?	FALSE	AT2G43790	MAP kinase 6 (MPK6)
BnaC04g03080D	319.177	254.538	0.32648	FALSE	AT2G43790	MAP kinase 6 (MPK6)
BnaC08g29970D	0	0.353978	#NAME?	FALSE	AT2G43790	MAP kinase 6 (MPK6)
BnaA03g27200D	29.0636	16.9384	0.77891	FALSE	AT3G02000	ROXY1
BnaC03g32200D	44.4067	28.0384	0.66337	FALSE	AT3G02000	ROXY1
BnaA03g30280D	0	43.9562	#NAME?	TRUE	AT3G07970	QUARTET 2 (QRT2)
BnaA05g29740D	1.75079	103.489	-5.8853	FALSE	AT3G07970	QUARTET 2 (QRT2)
BnaC03g35600D	0	14.1904	#NAME?	FALSE	AT3G07970	QUARTET 2 (QRT2)
BnaC03g35610D	0	8.45829	#NAME?	FALSE	AT3G07970	QUARTET 2 (QRT2)
BnaC05g44070D	0	3.23142	#NAME?	FALSE	AT3G07970	QUARTET 2 (QRT2)
BnaA01g31660D	377.696	278.836	0.43781	FALSE	AT3G10490	NAC domain containing protein 52 (NAC052)
BnaA01g31670D	186.107	156.235	0.25241	FALSE	AT3G10490	NAC domain containing protein 52 (NAC052)
BnaA01g31680D	59.7511	9.7581	2.6143	TRUE	AT3G10490	NAC domain containing protein 52 (NAC052)
BnaA02g00900D	0	660.545	#NAME?	TRUE	AT3G10490	NAC domain containing protein 52 (NAC052)
BnaAnng34430D	164.963	90.5262	0.86573	TRUE	AT3G10490	NAC domain containing protein 52 (NAC052)
BnaA05g27620D	358.28	864.781	-1.2712	TRUE	AT3G11440	myb domain protein 65 (MYB65)
BnaAnng29990D	31.1317	79.4095	-1.3509	TRUE	AT3G11440	myb domain protein 65 (MYB65)
BnaAnng40310D	19.9967	29.4243	-0.55724	FALSE	AT3G11440	myb domain protein 65 (MYB65)
BnaCnng31260D	10.8722	18.3535	-0.75541	FALSE	AT3G11440	myb domain protein 65 (MYB65)
BnaCnng49390D	97.4611	195.869	-1.007	TRUE	AT3G11440	myb domain protein 65 (MYB65)
BnaA05g27080D	0	5317.42	#NAME?	TRUE	AT3G11980	MALE STERILITY 2 (MS2)
BnaC05g41210D	0	9.62632	#NAME?	FALSE	AT3G11980	MALE STERILITY 2 (MS2)
BnaA01g29930D	33.2701	7568.21	-7.8296	TRUE	AT3G13220	WBC27
BnaC01g37830D	0	1.08474	#NAME?	FALSE	AT3G13220	WBC27
BnaA01g29790D	49.897	101.628	-1.0263	TRUE	AT3G13890	myb domain protein 26 (MYB26)
BnaC01g37360D	18.5061	113.957	-2.6224	TRUE	AT3G13890	myb domain protein 26 (MYB26)
BnaA05g25530D	113.329	142.051	-0.32589	FALSE	AT3G13890	myb domain protein 26 (MYB26)
BnaCnng28540D	0	0	NA	NA	AT3G13890	myb domain protein 26 (MYB26)
BnaA06g31470D	8.38305	394.046	-5.5547	TRUE	AT3G28470	DEFECTIVE IN MERISTEM DEVELOPMENT AND FUNCTION 1 (TDF1)
BnaC02g37370D	0	0	NA	NA	AT3G28470	DEFECTIVE IN MERISTEM DEVELOPMENT AND FUNCTION 1 (TDF1)
BnaA06g19570D	183.418	458.334	-1.3213	TRUE	AT3G43210	TETRASPORE (TES)
BnaCnng11920D	259.32	692.75	-1.4176	TRUE	AT3G43210	TETRASPORE (TES)
BnaA06g18440D	352.033	386.309	-0.13405	FALSE	AT3G45640	mitogen-activated protein kinase 3 (MPK3)
BnaC03g55440D	224.396	290.8	-0.37398	FALSE	AT3G45640	mitogen-activated protein kinase 3 (MPK3)
BnaA03g40550D	171.435	477.773	-1.4787	TRUE	AT3G49670	BARELY ANY MERISTEM 2 (BAM2)
BnaC07g31500D	1616.23	1418.19	0.18858	FALSE	AT3G49670	BARELY ANY MERISTEM 2 (BAM2)
BnaA04g01590D	517.679	1899.52	-1.8755	TRUE	AT3G59530	Calcium-dependent phosphotriesterase superfamily protein
BnaA09g37870D	3.12104	3450.87	-10.111	TRUE	AT3G59530	Calcium-dependent phosphotriesterase superfamily protein
BnaC04g23020D	1827.7	5606.69	-1.6171	TRUE	AT3G59530	Calcium-dependent phosphotriesterase superfamily protein
BnaC08g29730D	0.350159	1917.44	-12.419	TRUE	AT3G59530	Calcium-dependent phosphotriesterase superfamily protein
BnaC06g18130D	3.8949	101.743	-4.7072	TRUE	AT3G61730	REDUCED MALE FERTILITY (RMF)
BnaA04g06280D	1.07205	10374.1	-13.24	TRUE	AT4G14080	maternal effect embryo arrest 48 (MEE48)
BnaA05g13090D	1.08284	3475.78	-11.648	TRUE	AT4G14080	maternal effect embryo arrest 48 (MEE48)
BnaA08g07600D	0.711105	3428.13	-12.235	TRUE	AT4G14080	maternal effect embryo arrest 48 (MEE48)
BnaC04g29090D	0.350159	9896.65	-14.787	TRUE	AT4G14080	maternal effect embryo arrest 48 (MEE48)
BnaC06g11750D	1.06126	5587.89	-12.362	TRUE	AT4G14080	maternal effect embryo arrest 48 (MEE48)
BnaC08g08340D	0	5761.47	#NAME?	TRUE	AT4G14080	maternal effect embryo arrest 48 (MEE48)
BnaA01g09760D	327.076	363.533	-0.15246	FALSE	AT4G18960	AGAMOUS (AG)
BnaA03g43820D	70.1641	109.638	-0.64394	FALSE	AT4G18960	AGAMOUS (AG)
BnaC01g11460D	637.253	698.352	-0.13209	FALSE	AT4G18960	AGAMOUS (AG)
BnaC03g62970D	339.673	433.339	-0.35135	FALSE	AT4G18960	AGAMOUS (AG)
BnaC07g35640D	0	0	NA	NA	AT4G18960	AGAMOUS (AG)
BnaC09g24200D	3.87529	1.32364	1.5498	FALSE	AT4G18960	AGAMOUS (AG)
BnaAnng24260D	0	325.612	#NAME?	TRUE	AT4G21330	DYSFUNCTIONAL TAPETUM 1 (DYT1)
BnaC01g12730D	1.03401	226.8	-7.777	TRUE	AT4G21330	DYSFUNCTIONAL TAPETUM 1 (DYT1)
BnaC03g64200D	0	37.0524	#NAME?	TRUE	AT4G21330	DYSFUNCTIONAL TAPETUM 1 (DYT1)
BnaA01g14320D	324.208	390.815	-0.26957	FALSE	AT4G24960	HVA22 homologue D (HVA22D)
BnaA03g47030D	23.218	115.211	-2.311	TRUE	AT4G24960	HVA22 homologue D (HVA22D)
BnaC01g16810D	1152.29	1482.65	-0.36368	FALSE	AT4G24960	HVA22 homologue D (HVA22D)
BnaC07g39210D	27.7715	70.3806	-1.3416	TRUE	AT4G24960	HVA22 homologue D (HVA22D)
BnaA01g14340D	78.7812	71.0571	0.14887	FALSE	AT4G24972	TAPETUM DETERMINANT 1 (TPD1)
BnaC01g16830D	65.5967	62.3964	0.072162	FALSE	AT4G24972	TAPETUM DETERMINANT 1 (TPD1)
BnaA01g16350D	48.558	319.97	-2.7202	TRUE	AT4G27330	SPOROCYTELESS (SPL)
BnaA03g58770D	17.5652	11.6549	0.59179	FALSE	AT4G27330	SPOROCYTELESS (SPL)
BnaC01g19500D	48.3493	305.752	-2.6608	TRUE	AT4G27330	SPOROCYTELESS (SPL)
BnaC07g40830D	179.154	76.1277	1.2347	TRUE	AT4G27330	SPOROCYTELESS (SPL)
BnaA01g02360D	2.12253	6338.8	-11.544	TRUE	AT4G34850	LESS ADHESIVE POLLEN 5 (LAP5)
BnaA03g53070D	1.3924	6586.67	-12.208	TRUE	AT4G34850	LESS ADHESIVE POLLEN 5 (LAP5)
BnaA09g41780D	0	141.922	#NAME?	TRUE	AT4G34850	LESS ADHESIVE POLLEN 5 (LAP5)
BnaAnng15370D	0	5193.72	#NAME?	TRUE	AT4G34850	LESS ADHESIVE POLLEN 5 (LAP5)
BnaC01g03620D	0.360946	3512	-13.248	TRUE	AT4G34850	LESS ADHESIVE POLLEN 5 (LAP5)
BnaC03g65730D	0.341923	6129.88	-14.13	TRUE	AT4G34850	LESS ADHESIVE POLLEN 5 (LAP5)
BnaC07g45280D	0	3850.38	#NAME?	TRUE	AT4G34850	LESS ADHESIVE POLLEN 5 (LAP5)
BnaA04g21720D	0.341923	6129.88	-14.13	TRUE	AT1G02050	LESS ADHESIVE POLLEN 6 (LAP6)
BnaC04g45570D	0	3850.38	#NAME?	TRUE	AT1G02050	LESS ADHESIVE POLLEN 6 (LAP6)
BnaA01g02000D	76.9409	1385.47	-4.1705	TRUE	AT4G35420	dihydroflavonol 4-reductase-like1 (DRL1)
BnaA08g15000D	0.360946	2950.39	-12.997	TRUE	AT4G35420	dihydroflavonol 4-reductase-like1 (DRL1)
BnaC01g03140D	536.226	9690.19	-4.1756	TRUE	AT4G35420	dihydroflavonol 4-reductase-like1 (DRL1)
BnaC03g62280D	1.08284	5799.78	-12.387	TRUE	AT4G35420	dihydroflavonol 4-reductase-like1 (DRL1)
BnaA10g23620D	1335.8	1008.88	0.40496	TRUE	AT5G07180	ERECTA-like 2 (ERL2)
BnaC09g48340D	1155.1	925.784	0.31927	FALSE	AT5G07180	ERECTA-like 2 (ERL2)
BnaA10g23720D	364.368	813.636	-1.159	TRUE	AT5G07280	EXCESS MICROSPOROCYTES1 (EMS1)
BnaC09g48450D	437.569	1112.42	-1.3461	TRUE	AT5G07280	EXCESS MICROSPOROCYTES1 (EMS1)
BnaA02g01990D	5.58549	146.792	-4.7159	TRUE	AT5G14070	ROXY2
BnaA03g04700D	27.3064	101.447	-1.8934	TRUE	AT5G14070	ROXY2
BnaA10g19580D	1.39495	2.25075	-0.69019	FALSE	AT5G14070	ROXY2
BnaC02g05130D	0	0	NA	NA	AT5G14070	ROXY2
BnaC03g06240D	0	0	NA	NA	AT5G14070	ROXY2
BnaC09g54660D	2.11684	5.10771	-1.2708	FALSE	AT5G14070	ROXY2
BnaA10g14090D	0	515.791	#NAME?	TRUE	AT5G22260	male sterility 1 (MS1)
BnaC05g37900D	0	505.016	#NAME?	TRUE	AT5G22260	male sterility 1 (MS1)
BnaA04g10120D	0	185.796	#NAME?	TRUE	AT5G40260	Nodulin MtN3 family protein
BnaA05g30320D	6.36445	23.9836	-1.9139	FALSE	AT5G40260	Nodulin MtN3 family protein
BnaC04g32240D	0	345.328	#NAME?	TRUE	AT5G40260	Nodulin MtN3 family protein
BnaCnng49080D	0	0	NA	NA	AT5G40260	Nodulin MtN3 family protein
BnaA02g07770D	0.700317	2.05441	-1.5526	FALSE	AT5G58230	MULTICOPY SUPRESSOR OF IRA1 (MSI1)
BnaA03g09860D	1232.38	1206.29	0.03087	FALSE	AT5G58230	MULTICOPY SUPRESSOR OF IRA1 (MSI1)
BnaA03g58630D	0.700317	0	Inf	FALSE	AT5G58230	MULTICOPY SUPRESSOR OF IRA1 (MSI1)
BnaA05g22000D	0	0	NA	NA	AT5G58230	MULTICOPY SUPRESSOR OF IRA1 (MSI1)
BnaA10g29210D	202.375	675.131	-1.7381	TRUE	AT5G58230	MULTICOPY SUPRESSOR OF IRA1 (MSI1)
BnaAnng11080D	0	0.353978	#NAME?	FALSE	AT5G58230	MULTICOPY SUPRESSOR OF IRA1 (MSI1)
BnaC02g10840D	232.002	228.75	0.020365	FALSE	AT5G58230	MULTICOPY SUPRESSOR OF IRA1 (MSI1)
BnaC03g12490D	1734.43	1762.32	-0.023021	FALSE	AT5G58230	MULTICOPY SUPRESSOR OF IRA1 (MSI1)
BnaC05g49460D	0	0	NA	NA	AT5G58230	MULTICOPY SUPRESSOR OF IRA1 (MSI1)
BnaC09g33680D	75.471	97.3287	-0.36694	FALSE	AT5G58230	MULTICOPY SUPRESSOR OF IRA1 (MSI1)
BnaA06g21690D	618.343	769.874	-0.31622	FALSE	AT5G62230	ERECTA-like 1 (ERL1)
BnaC03g51830D	445.623	535.014	-0.26375	FALSE	AT5G62230	ERECTA-like 1 (ERL1)
BnaA06g24650D	4192.06	3320.47	0.33627	FALSE	AT5G65700	BARELY ANY MERISTEM 1 (BAM1)
BnaAnng26370D	0	0	NA	NA	AT5G65700	BARELY ANY MERISTEM 1 (BAM1)
BnaC02g05440D	0	0	NA	NA	AT5G65700	BARELY ANY MERISTEM 1 (BAM1)
BnaC02g32660D	9.43097	7.33718	0.36218	FALSE	AT5G65700	BARELY ANY MERISTEM 1 (BAM1)
BnaCnng13280D	3242.74	2629.46	0.30245	FALSE	AT5G65700	BARELY ANY MERISTEM 1 (BAM1)
BnaA01g29930D	33.2701	7568.21	-7.8296	TRUE	AT3G13220	ATP-BINDING CASSETTE G26 (ABCG26)
BnaC01g37830D	0	1.08474	#NAME?	FALSE	AT3G13220	ATP-BINDING CASSETTE G26 (ABCG26)
